# Supplementary material for: Oxidative C–N coupling of azoles with cycloheptatriene using an oxoammonium salt bearing the nitrate anion
Source: Royal Society of Chemistry journal article supplement (doi:10.1039/d6ra02034h), 2026-05-19

# Oxidative C-N coupling of azoles with cycloheptatriene using an Oxoammonium Salt Bearing the Nitrate Anion

Manisha Sharma, Isabella M. Kulawik, and Nicholas E. Leadbeater\*

<sup>a</sup> Department of Chemistry, University of Connecticut, 55 North Eagleville Road, Storrs, Connecticut 06269, USA.

\* E-mail: [nicholas.leadbeater@uconn.edu](mailto:nicholas.leadbeater@uconn.edu)

## SUPPORTING INFORMATION

|                                                                                                                                             |    |
|---------------------------------------------------------------------------------------------------------------------------------------------|----|
| General Considerations.....                                                                                                                 | 2  |
| Chemicals .....                                                                                                                             | 2  |
| General procedure for the preparation of 1-(cyclohepta-2,5,6-trien-1-yl)azoles .....                                                        | 2  |
| Product Characterization .....                                                                                                              | 3  |
| References .....                                                                                                                            | 4  |
| <sup>1</sup> H-, <sup>13</sup> C-NMR Spectra of Synthesized Compounds.....                                                                  | 5  |
| <sup>1</sup> H-NMR (400 MHz CDCl <sub>3</sub> ) <b>1-(Cyclohepta-2,4,6-trien-1-yl)-1H-pyrazole (7a)</b> .....                               | 5  |
| <sup>13</sup> C-NMR (101 MHz CDCl <sub>3</sub> ) <b>1-(Cyclohepta-2,4,6-trien-1-yl)-1H-pyrazole (7a)</b> .....                              | 6  |
| <sup>1</sup> H-NMR (400 MHz CDCl <sub>3</sub> ) <b>3-Trifluoromethyl-1-(cyclohepta-2,4,6-trien-1-yl)-1H-pyrazole (7b)</b> .....             | 7  |
| <sup>13</sup> C-NMR (101 MHz CDCl <sub>3</sub> ) <b>3-Trifluoromethyl-1-(cyclohepta-2,4,6-trien-1-yl)-1H-pyrazole (7b)</b> .....            | 8  |
| <sup>19</sup> F-NMR (376 MHz CDCl <sub>3</sub> ) <b>3-Trifluoromethyl-1-(cyclohepta-2,4,6-trien-1-yl)-1H-pyrazole (7b)</b> .....            | 9  |
| <sup>1</sup> H-NMR (400 MHz CDCl <sub>3</sub> ) <b>3-Phenyl-1-(cyclohepta-2,4,6-trien-1-yl)-1H-pyrazole (7c)</b> .....                      | 10 |
| <sup>13</sup> C-NMR (101 MHz CDCl <sub>3</sub> ) <b>3-Phenyl-1-(cyclohepta-2,4,6-trien-1-yl)-1H-pyrazole (7c)</b> .....                     | 11 |
| <sup>1</sup> H-NMR (400 MHz CDCl <sub>3</sub> ) <b>4-Methyl-1-(cyclohepta-2,4,6-trien-1-yl)-1H-pyrazole (7d)</b> .....                      | 12 |
| <sup>13</sup> C-NMR (101 MHz CDCl <sub>3</sub> ) <b>4-Methyl-1-(cyclohepta-2,4,6-trien-1-yl)-1H-pyrazole (7d)</b> .....                     | 13 |
| <sup>1</sup> H-NMR (400 MHz CDCl <sub>3</sub> ) <b>4-Chloro-(cyclohepta-2,4,6-trien-1-yl)-1H-pyrazole (7e)</b> .....                        | 14 |
| <sup>13</sup> C-NMR (101 MHz CDCl <sub>3</sub> ) <b>4-Chloro-(cyclohepta-2,4,6-trien-1-yl)-1H-pyrazole (7e)</b> .....                       | 15 |
| <sup>1</sup> H-NMR (400 MHz CDCl <sub>3</sub> ) <b>4-Bromo-1-(cyclohepta-2,4,6-trien-1-yl)-1H-pyrazole (7f)</b> .....                       | 16 |
| <sup>13</sup> C-NMR (101 MHz CDCl <sub>3</sub> ) <b>4-Bromo-1-(cyclohepta-2,4,6-trien-1-yl)-1H-pyrazole (7f)</b> .....                      | 17 |
| <sup>1</sup> H-NMR (400 MHz CDCl <sub>3</sub> ) <b>1-(Cyclohepta-2,4,6-trien-1-yl)-3-methyl-5-(trifluoromethyl)-1H-pyrazole (7g)</b> .....  | 18 |
| <sup>13</sup> C-NMR (101 MHz CDCl <sub>3</sub> ) <b>1-(Cyclohepta-2,4,6-trien-1-yl)-3-methyl-5-(trifluoromethyl)-1H-pyrazole (7g)</b> ..... | 19 |
| <sup>19</sup> F-NMR (376 MHz CDCl <sub>3</sub> ) <b>1-(Cyclohepta-2,4,6-trien-1-yl)-3-methyl-5-(trifluoromethyl)-1H-pyrazole (7g)</b> ..... | 20 |
| <sup>1</sup> H-NMR (400 MHz CDCl <sub>3</sub> ) <b>1-(Cyclohepta-2,4,6-trien-1-yl)-1H-1,2,3-triazole (7h)</b> .....                         | 21 |

|                                                                                                                                    |    |
|------------------------------------------------------------------------------------------------------------------------------------|----|
| <sup>13</sup> C-NMR (101 MHz CDCl <sub>3</sub> ) <b>1-(Cyclohepta-2,4,6-trien-1-yl)-1H-1,2,3-triazole (7h)</b> .....               | 22 |
| <sup>1</sup> H-NMR (400 MHz CDCl <sub>3</sub> ) <b>Crude NMR of 1-(Cyclohepta-2,4,6-trienyl-1-yl)-1H-1,2,4-triazole (7i)</b> ..... | 23 |
| <sup>1</sup> H-NMR (400 MHz CDCl <sub>3</sub> ) <b>Crude NMR of 1-(Cyclohepta-2,4,6-trienyl-1-yl)-1H-imidazole (7j)</b> .....      | 24 |
| <sup>1</sup> H-NMR (400 MHz CDCl <sub>3</sub> ) <b>1-Cyclohepta-2,4,6-trienyl-1H-indazole (7k)</b> .....                           | 25 |
| <sup>13</sup> C-NMR (101 MHz CDCl <sub>3</sub> ) <b>1-Cyclohepta-2,4,6-trienyl-1H-indazole (7k)</b> .....                          | 26 |
| <sup>1</sup> H-NMR (400 MHz CDCl <sub>3</sub> ) <b>Crude NMR of 7-phenylthiocycloheptatriene(7l)</b> .....                         | 27 |

## General Considerations

NMR spectra (<sup>1</sup>H-, <sup>13</sup>C-, and <sup>19</sup>F-) were performed at 300 K using either a Brüker Avance 300 MHz with BBO probe, or Brüker Avance NEO 400 400 MHz with TBO probe spectrometers. <sup>1</sup>H-NMR spectra were referenced to residual CHCl<sub>3</sub> (7.26 ppm) in CDCl<sub>3</sub>. <sup>13</sup>C-NMR spectra were referenced to CDCl<sub>3</sub> (77.16 ppm). <sup>19</sup>F-NMR spectra were referenced to hexafluorobenzene (C<sub>6</sub>F<sub>6</sub>; -161.64 ppm).<sup>1</sup> Reactions were monitored by TLC on silica gel plates (60 Å porosity, 250 μm thickness). TLC analysis was performed using UV light. Melting points were obtained using a Barnstead electrothermal Mel-Temp model 1001D.

## Chemicals

Deuterated chloroform (CDCl<sub>3</sub>) was purchased from Cambridge Isotope Laboratories. 4-acetamido-2,2,6,6-tetramethyl-oxo-piperidinium nitrate (Nitrate salt) was prepared and recrystallized using a previously reported protocol.<sup>2</sup> All chemicals were purchased from Oakwood Chemicals, Sigma Aldrich, Fisher Scientific, or TCI America.

## General procedure for the preparation of 1-(cyclohepta-2,5,6-trien-1-yl)azoles

### For convention heating:

To a 4-dram reaction vial equipped with a stir bar were added 4-acetamido-2,2,6,6-tetramethyl-oxo-piperidinium nitrate (BSNO<sub>3</sub>, 165mg, 0.6 equiv.), and 2ml of acetonitrile. Then nucleophile (1 mmol, 1 equiv.), cycloheptatriene (1.1 mmol, 1.1 equiv.) were added and the vial was closed tightly. The contents were then heated in an oil bath at 50 °C for 20 minutes. Upon completion, the product mixture was filtered through a pad of silica, the silica was washed with an 85:15 mixture of hexanes and ethyl acetate to elute the product. The solvent was then removed from the filtrate under vacuum, affording the pure product.

### For Microwave heating:

In a 10-mL glass microwave vial equipped with a stir bar were added 4-acetamido-2,2,6,6-tetramethyl-oxo-piperidinium nitrate (BSNO<sub>3</sub>, 165mg, 0.6 equiv.), and 2ml of acetonitrile. Then nucleophile (1 mmol, 1 equiv.), cycloheptatriene (1.1 mmol, 1.1 equiv.) were added and the vial was closed tightly. The contents were then heated in an oil bath at 45 °C for 30 minutes. Upon completion, the product mixture was filtered through a pad of silica, the silica was washed with an 85:15 mixture of hexanes and ethyl acetate to elute the product. The solvent was then removed from the filtrate under vacuum, affording the pure product.

## Product Characterization

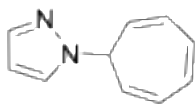

**1-(Cyclohepta-2,4,6-trien-1-yl)-1H-pyrazole (7a).** With a reaction time of 20 min, the product was obtained as a yellow oil (0.151g, 95.5%).  $^1\text{H NMR}$  (400 MHz,  $\text{CDCl}_3$ )  $\delta$  7.61 (d,  $J = 1.8$  Hz, 1H), 7.49 (dd,  $J = 2.3, 0.7$  Hz, 1H), 6.75 (dd,  $J = 3.7, 2.7$  Hz, 2H), 6.33 – 6.21 (m, 3H), 5.70 (ddt,  $J = 9.5, 5.2, 0.9$  Hz, 2H), 4.29 (tt,  $J = 5.1, 1.5$  Hz, 1H).  $^{13}\text{C NMR}$  (101 MHz,  $\text{CDCl}_3$ )  $\delta$  139.87, 131.40, 128.62, 124.10, 123.81, 105.74, 60.68.<sup>3</sup>

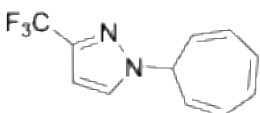

**3-Trifluoromethyl-1-(cyclohepta-2,4,6-trien-1-yl)-1H-pyrazole (7b).** With a reaction time of 20 min, the product was obtained as a yellow oil (0.205g, 91%).  $^1\text{H NMR}$  (400 MHz,  $\text{CDCl}_3$ )  $\delta$  7.52 (dd,  $J = 2.4, 1.1$  Hz, 1H), 6.76 (dd,  $J = 3.7, 2.7$  Hz, 2H), 6.56 (d,  $J = 2.4$  Hz, 1H), 6.30 (dddd,  $J = 9.3, 4.0, 2.6, 1.5$  Hz, 2H), 5.73 – 5.64 (m, 2H), 4.37 (tt,  $J = 5.3, 1.6$  Hz, 1H).  $^{13}\text{C NMR}$  (101 MHz,  $\text{CDCl}_3$ )  $\delta$  142.73 (q,  $J = 38.1$  Hz), 131.49, 130.11, 124.73, 122.78, 104.58 (q,  $J = 2.2$  Hz), 61.31.  $^{19}\text{F NMR}$  (376 MHz,  $\text{CDCl}_3$ )  $\delta$  -61.78.<sup>3</sup>

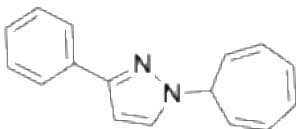

**3-Phenyl-1-(cyclohepta-2,4,6-trien-1-yl)-1H-pyrazole (7c).** With a reaction time of 20 min the product was obtained as a yellow oil (0.199g, 85%).  $^1\text{H NMR}$  (400 MHz,  $\text{CDCl}_3$ )  $\delta$  7.89 – 7.82 (m, 2H), 7.52 (d,  $J = 2.4$  Hz, 1H), 7.45 – 7.36 (m, 2H), 7.34 – 7.26 (m, 1H), 6.77 (dd,  $J = 3.7, 2.7$  Hz, 2H), 6.61 (d,  $J = 2.3$  Hz, 1H), 6.29 (dddd,  $J = 9.2, 4.0, 2.6, 1.6$  Hz, 2H), 5.82 – 5.73 (m, 2H), 4.31 (tt,  $J = 5.1, 1.6$  Hz, 1H).  $^{13}\text{C NMR}$  (101 MHz,  $\text{CDCl}_3$ )  $\delta$  151.93, 133.78, 131.42, 129.97, 128.71, 127.72, 125.83, 124.12, 124.05, 103.10, 61.03.<sup>3</sup>

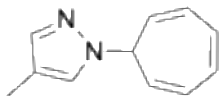

**4-Methyl-1-(cyclohepta-2,4,6-trien-1-yl)-1H-pyrazole (7d).** With a reaction time of 20 min, the product was obtained as a clear oil (0.158, 92%).  $^1\text{H NMR}$  (400 MHz,  $\text{CDCl}_3$ )  $\delta$  7.40 (s, 1H), 7.28 – 7.23 (m, 1H), 6.79 – 6.68 (m, 2H), 6.25 (dddd,  $J = 9.2, 3.9, 2.6, 1.6$  Hz, 2H), 5.67 (ddt,  $J = 9.4, 5.1, 0.9$  Hz, 2H), 4.19 (tt,  $J = 5.0, 1.5$  Hz, 1H), 2.10 (d,  $J = 0.7$  Hz, 3H).  $^{13}\text{C NMR}$  (101 MHz,  $\text{CDCl}_3$ )  $\delta$  140.23, 131.36, 127.44, 123.99, 123.97, 116.33, 60.57, 9.04.<sup>3</sup>

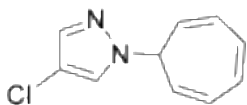

**4-Chloro-1-(cyclohepta-2,4,6-trien-1-yl)-1H-pyrazole (7e).** With a reaction time of 20 min the product was obtained as a yellow solid (0.168g, 87%). **Melting point** 65-67°C.  $^1\text{H NMR}$  (400 MHz,  $\text{CDCl}_3$ )  $\delta$  7.48 (dd,  $J = 18.4, 0.7$  Hz, 2H), 6.75 (dd,  $J = 3.7, 2.7$  Hz, 2H), 6.30 (dddd,  $J = 9.3, 3.9, 2.6, 1.4$  Hz, 2H), 5.67 (ddt,  $J = 9.4, 5.3, 0.9$  Hz, 2H), 4.29 (tt,  $J = 5.3, 1.4$  Hz, 1H).  $^{13}\text{C NMR}$  (101 MHz,  $\text{CDCl}_3$ )  $\delta$  138.20, 131.48, 126.77, 124.73, 122.95, 110.20, 61.11.<sup>3</sup>

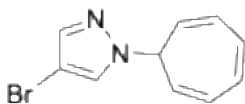

**4-Bromo-1-(cyclohepta-2,4,6-trien-1-yl)-1H-pyrazole (7f).** With a reaction time of 20 min the product was obtained as a yellow oil (0.237g, 78%).  $^1\text{H NMR}$  (400 MHz,  $\text{CDCl}_3$ )  $\delta$  7.49 (dd,  $J = 18.5, 0.7$  Hz, 2H), 6.80 – 6.70 (m, 2H), 6.30 (dddd,  $J = 9.2, 4.0, 2.6, 1.4$  Hz, 2H), 5.67 (ddt,  $J = 9.3, 5.2, 0.9$  Hz, 2H), 4.29 (tt,  $J = 5.2, 1.4$

Hz, 1H).  $^{13}\text{C}$  NMR (101 MHz,  $\text{CDCl}_3$ )  $\delta$  138.20, 131.49, 126.78, 124.73, 122.95, 110.20, 61.11.<sup>4</sup>

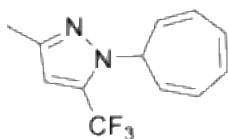

**1-(Cyclohepta-2,4,6-trien-1-yl)-3-methyl-5-(trifluoromethyl)-1H-pyrazole (7g).**

With a reaction time of 20 min the product was obtained as a pale-yellow oil (0.204g, 85%).  $^1\text{H}$  NMR (400 MHz,  $\text{CDCl}_3$ )  $\delta$  6.83 – 6.73 (m, 2H), 6.34 (s, 1H), 6.27 (dddd,  $J$  = 9.2, 4.0, 2.6, 1.7 Hz, 2H), 5.71 – 5.63 (m, 2H), 4.08 (tt,  $J$  = 4.8, 1.7 Hz, 1H), 2.22 (d,  $J$  = 0.8 Hz, 3H).  $^{13}\text{C}$  NMR (101 MHz,  $\text{CDCl}_3$ )  $\delta$  141.76 (q,  $J$  = 37.9 Hz), 140.08, 131.48, 123.85, 123.30, 104.19 (q,  $J$  = 2.1 Hz), 58.27, 11.05.  $^{19}\text{F}$  NMR (376 MHz,  $\text{CDCl}_3$ )  $\delta$  -61.94.<sup>3</sup>

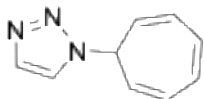

**1-(Cyclohepta-2,4,6-trien-1-yl)-1H-1,2,3-triazole (7h).**

With a reaction time of 20 min the product was obtained as a yellow oil (0.120g, 75%).  $^1\text{H}$  NMR (400 MHz,  $\text{CDCl}_3$ )  $\delta$  7.69 (s, 2H), 6.83 – 6.73 (m, 2H), 6.30 (dddd,  $J$  = 9.2, 3.9, 2.5, 1.6 Hz, 2H), 5.77 (dd,  $J$  = 9.5, 4.9 Hz, 2H), 4.61 (tt,  $J$  = 4.9, 1.6 Hz, 1H).  $^{13}\text{C}$  NMR (101 MHz,  $\text{CDCl}_3$ )  $\delta$  134.54, 131.69, 131.56, 125.43, 124.03, 122.56, 122.34, 63.75.<sup>3</sup>

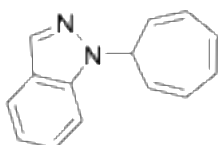

**1-Cyclohepta-2,4,6-trienyl-1H-indazole (7k).**

With a reaction time of 20 min the product was isolated as a white solid (0.179g, 86% yield).  $^1\text{H}$  NMR (400 MHz,  $\text{CDCl}_3$ )  $\delta$  8.11 (s, 1H), 7.78 (dt,  $J$  = 8.1, 1.1 Hz, 1H), 7.44 – 7.30 (m, 2H), 7.17 (ddd,  $J$  = 8.0, 4.8, 2.9 Hz, 1H), 6.87 – 6.77 (m, 2H), 6.37 – 6.24 (m, 2H), 5.79 (dd,  $J$  = 9.4, 4.8 Hz, 2H), 4.56 (tt,  $J$  = 4.8, 1.7 Hz, 1H).  $^{13}\text{C}$  NMR (101 MHz,  $\text{CDCl}_3$ )  $\delta$  139.44, 133.67, 131.51, 126.33, 124.60, 124.09, 123.95, 121.37, 120.96, 109.45, 58.17.<sup>5</sup>

## References

- (1) Rosenau, C. P.; Jelier, B. J.; Gossert, A. D.; Togni, A. Exposing the Origins of Irreproducibility in Fluorine NMR Spectroscopy. *Angew. Chem. Int. Ed.* **2018**, *57* (30), 9528–9533. <https://doi.org/10.1002/anie.201802620>.
- (2) Mercadante, M. A.; Kelly, C. B.; Bobbitt, J. M.; Tilley, L. J.; Leadbeater, N. E. Synthesis of 4-Acetamido-2,2,6,6-Tetramethylpiperidine-1-Oxoammonium Tetrafluoroborate and 4-Acetamido-(2,2,6,6-Tetramethyl-Piperidin-1-Yl)Oxyl and Their Use in Oxidative Reactions. *Nat. Protoc.* **2013**, *8* (4), 666–676. <https://doi.org/10.1038/nprot.2013.028>.
- (3) Schroder, C. M.; Kulawik, I. M.; Leadbeater, N. Aminoxyl-Mediated Electrocatalytic C–N Coupling of Azoles with Cycloheptatriene. *Synlett* **2025**, a-2752-9318. <https://doi.org/10.1055/a-2752-9318>.
- (4) Shao, X.; Tian, L.; Wang, Y. C–N Coupling of Azoles or Imides with Carbocations Generated by Electrochemical Oxidation. *Eur. J. Org. Chem.* **2019**, *2019* (25), 4089–4094. <https://doi.org/10.1002/ejoc.201900714>.
- (5) Hanefeld, W.; Hunz, I. Nitrosierungen an Hydrazinderivaten, 9. Mitt.: Neuartige oxidative C-N-Verknüpfungen von Indazolen und Benzotriazolen mit Cycloheptatrien sowie Di- und Triphenylmethanderivaten. *Arch. Pharm. (Weinheim)* **1993**, *326* (6), 323–329. <https://doi.org/10.1002/ardp.19933260604>.

# $^1\text{H}$ -, $^{13}\text{C}$ -NMR Spectra of Synthesized Compounds

$^1\text{H}$ -NMR (400 MHz  $\text{CDCl}_3$ ) 1-(Cyclohepta-2,4,6-trien-1-yl)-1H-pyrazole (7a)

7.61, 7.49, 7.49, 7.48, 7.26  $\text{CDCl}_3$ , 6.78, 6.76, 6.75, 6.75, 6.74, 6.72, 6.31, 6.31, 6.30, 6.29, 6.29, 6.29, 6.28, 6.28, 6.27, 6.27, 6.27, 6.26, 6.26, 6.26, 6.25, 5.72, 5.72, 5.71, 5.71, 5.71, 5.70, 5.70, 5.70, 5.69, 5.69, 5.68, 4.31, 4.30, 4.30, 4.29, 4.29, 4.29, 4.28, 4.28, 4.27

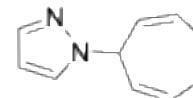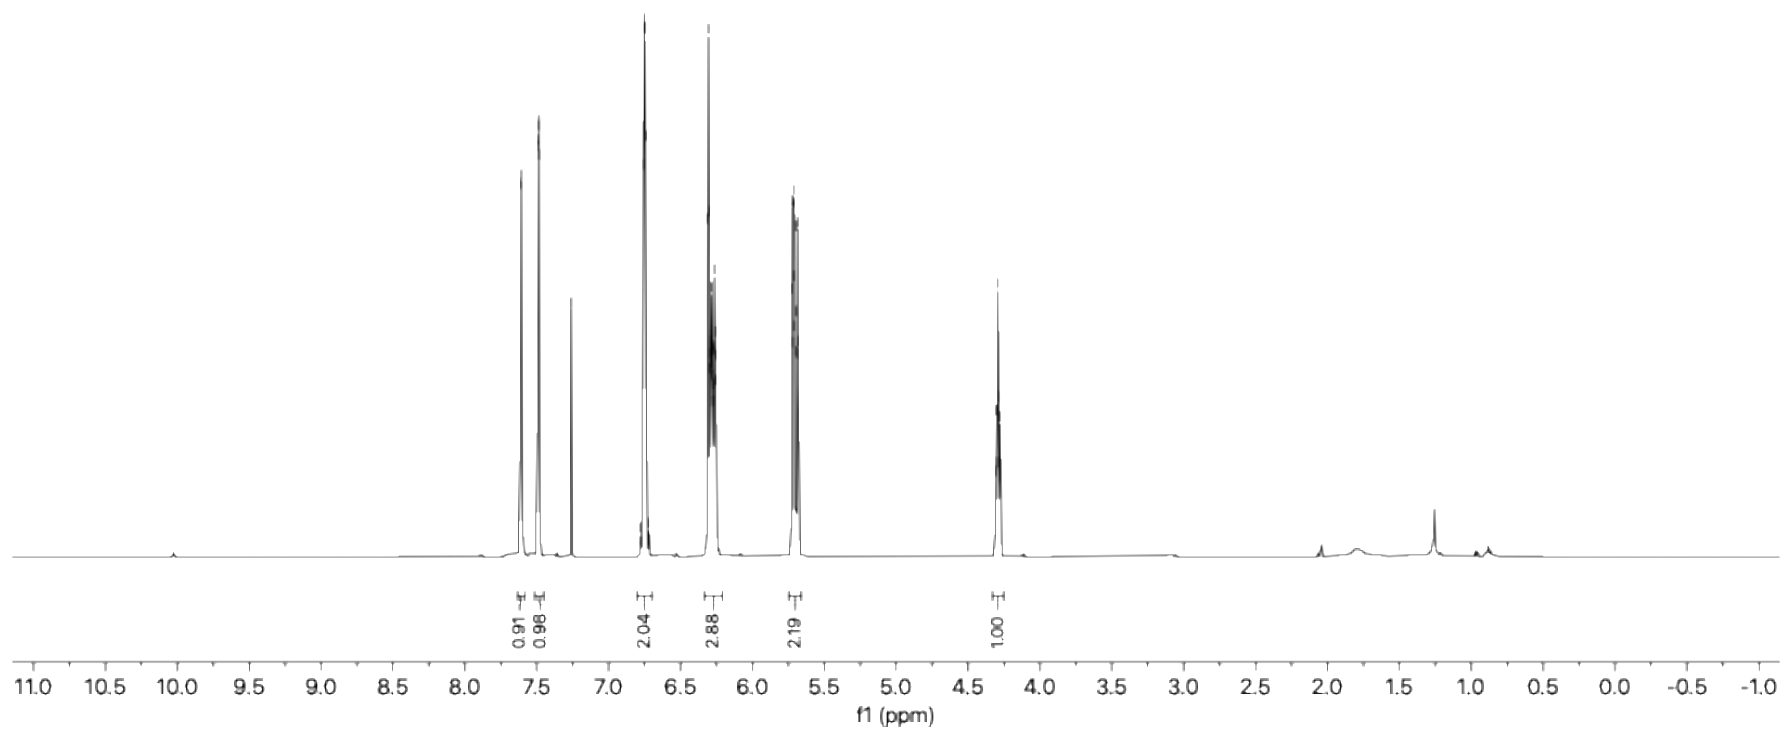

$^{13}\text{C}$ -NMR (101 MHz  $\text{CDCl}_3$ ) 1-(Cyclohepta-2,4,6-trien-1-yl)-1H-pyrazole (7a)

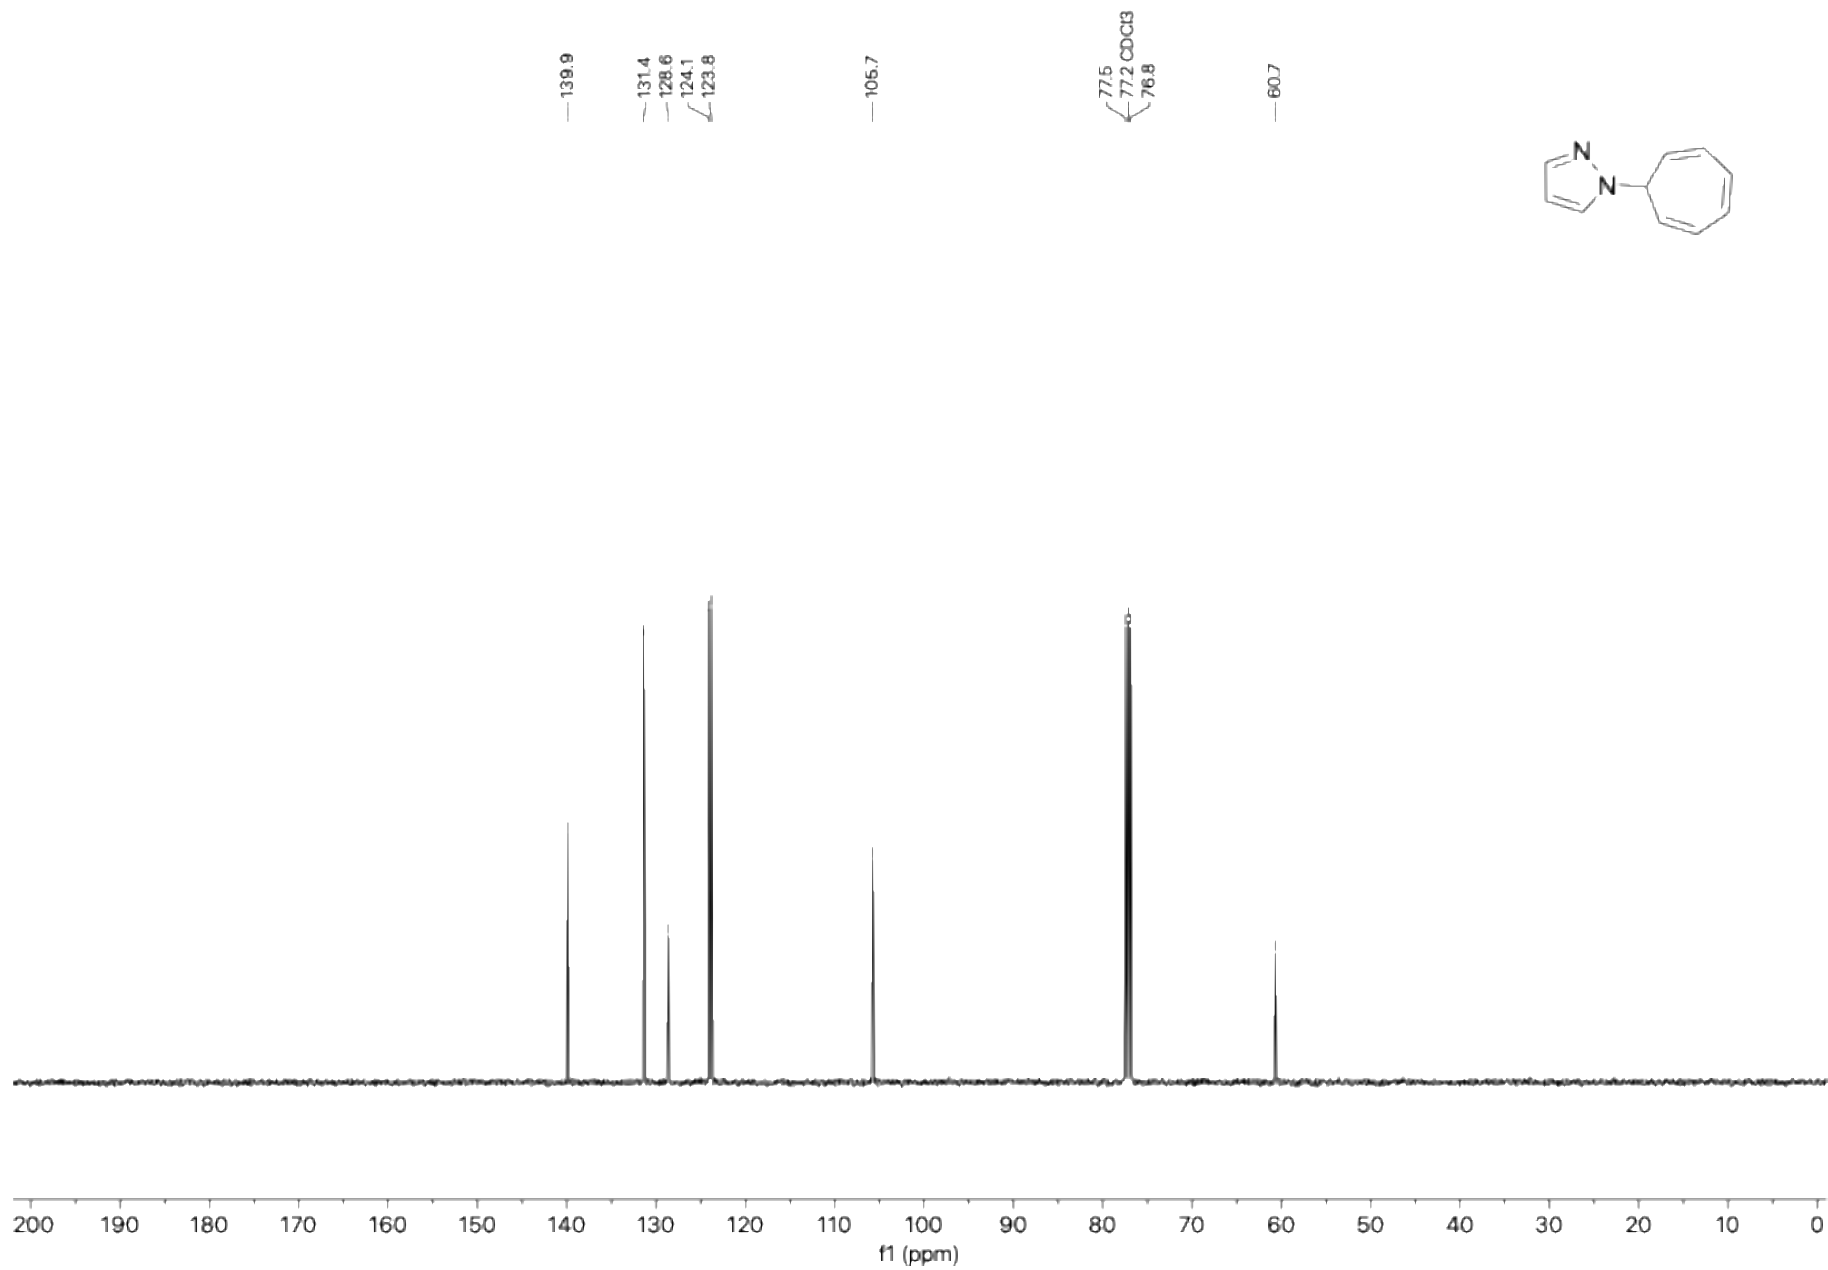

<sup>1</sup>H-NMR (400 MHz CDCl<sub>3</sub>) 3-Trifluoromethyl-1-(cyclohepta-2,4,6-trien-1-yl)-1H-pyrazole (7b)

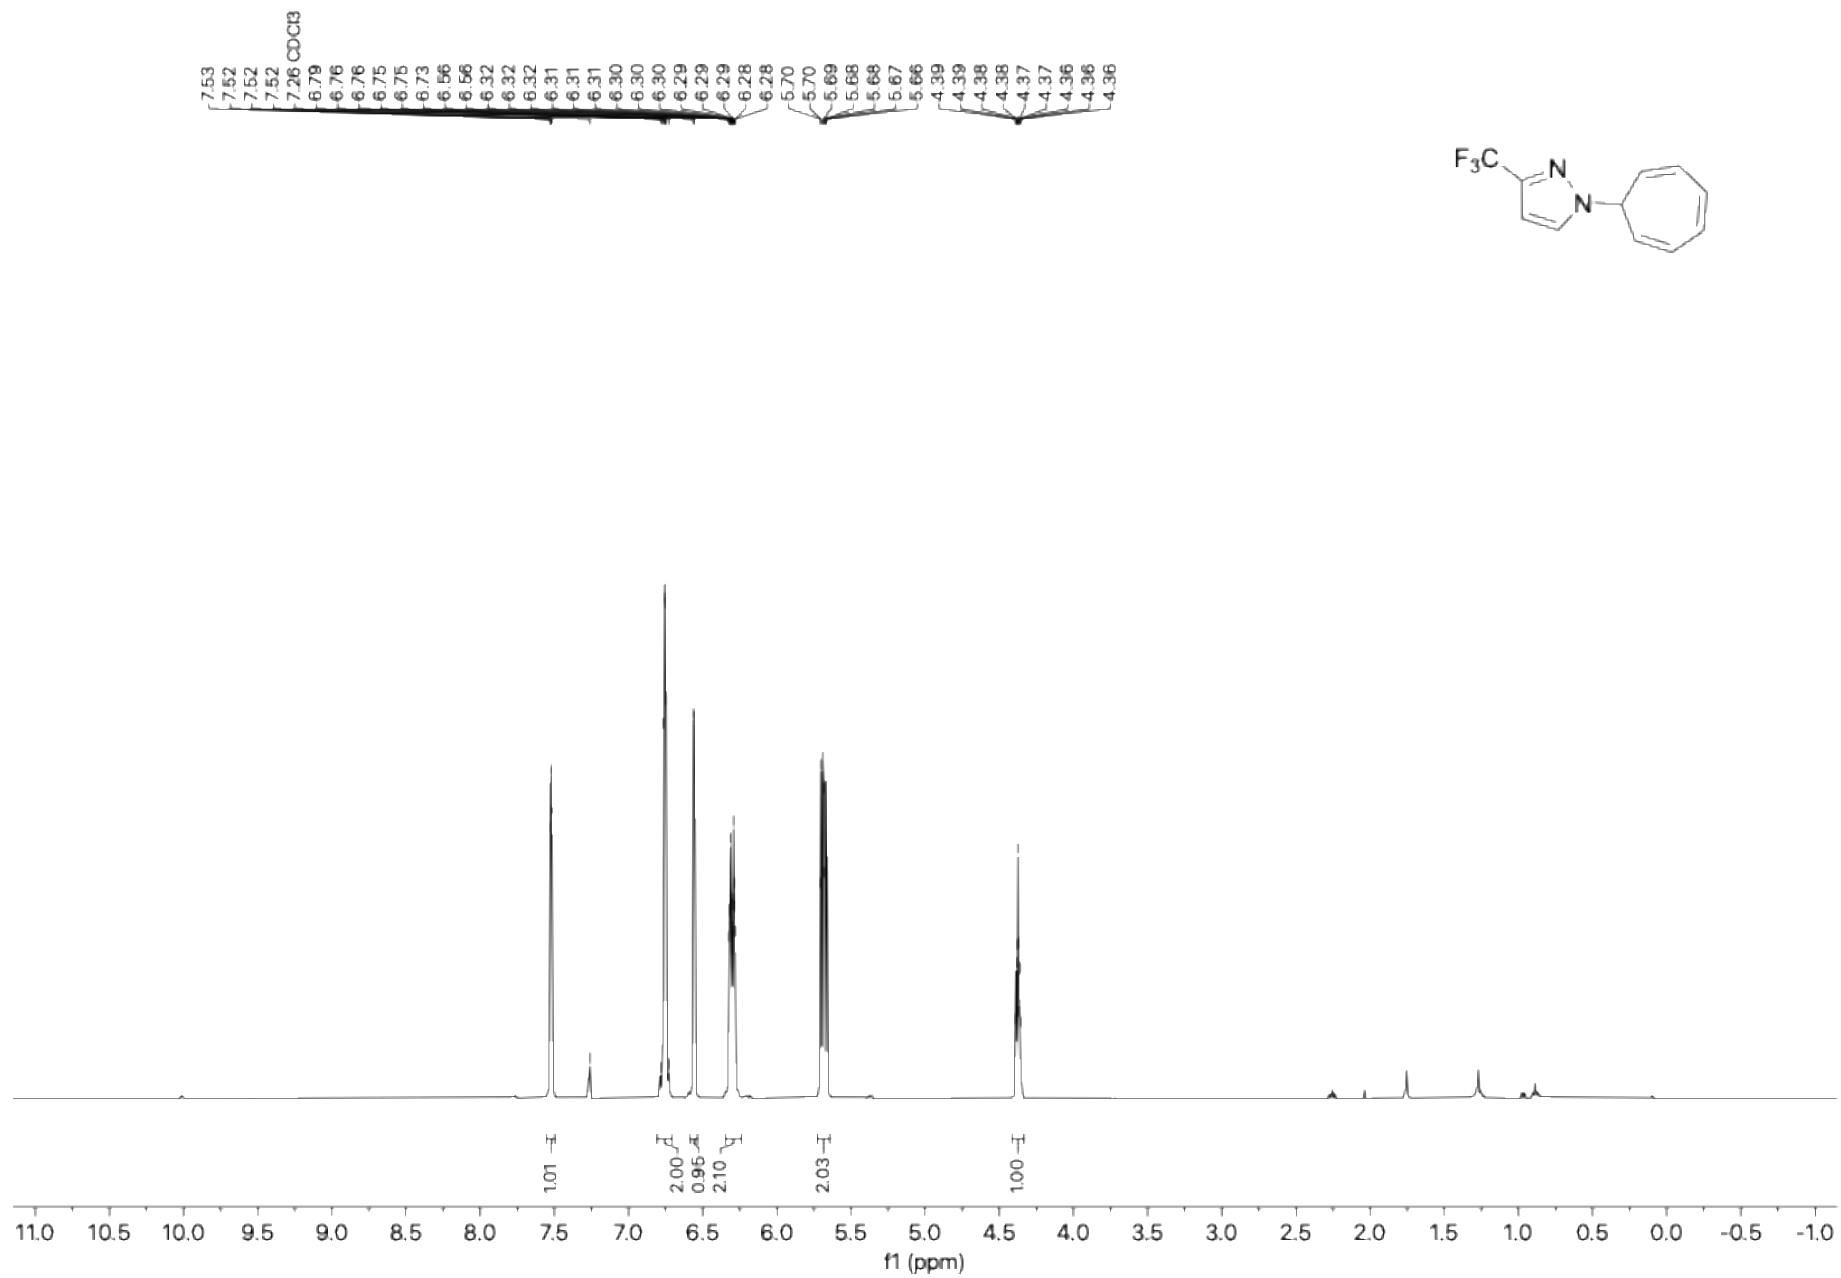

<sup>13</sup>C-NMR (101 MHz CDCl<sub>3</sub>) 3-Trifluoromethyl-1-(cyclohepta-2,4,6-trien-1-yl)-1H-pyrazole (7b)

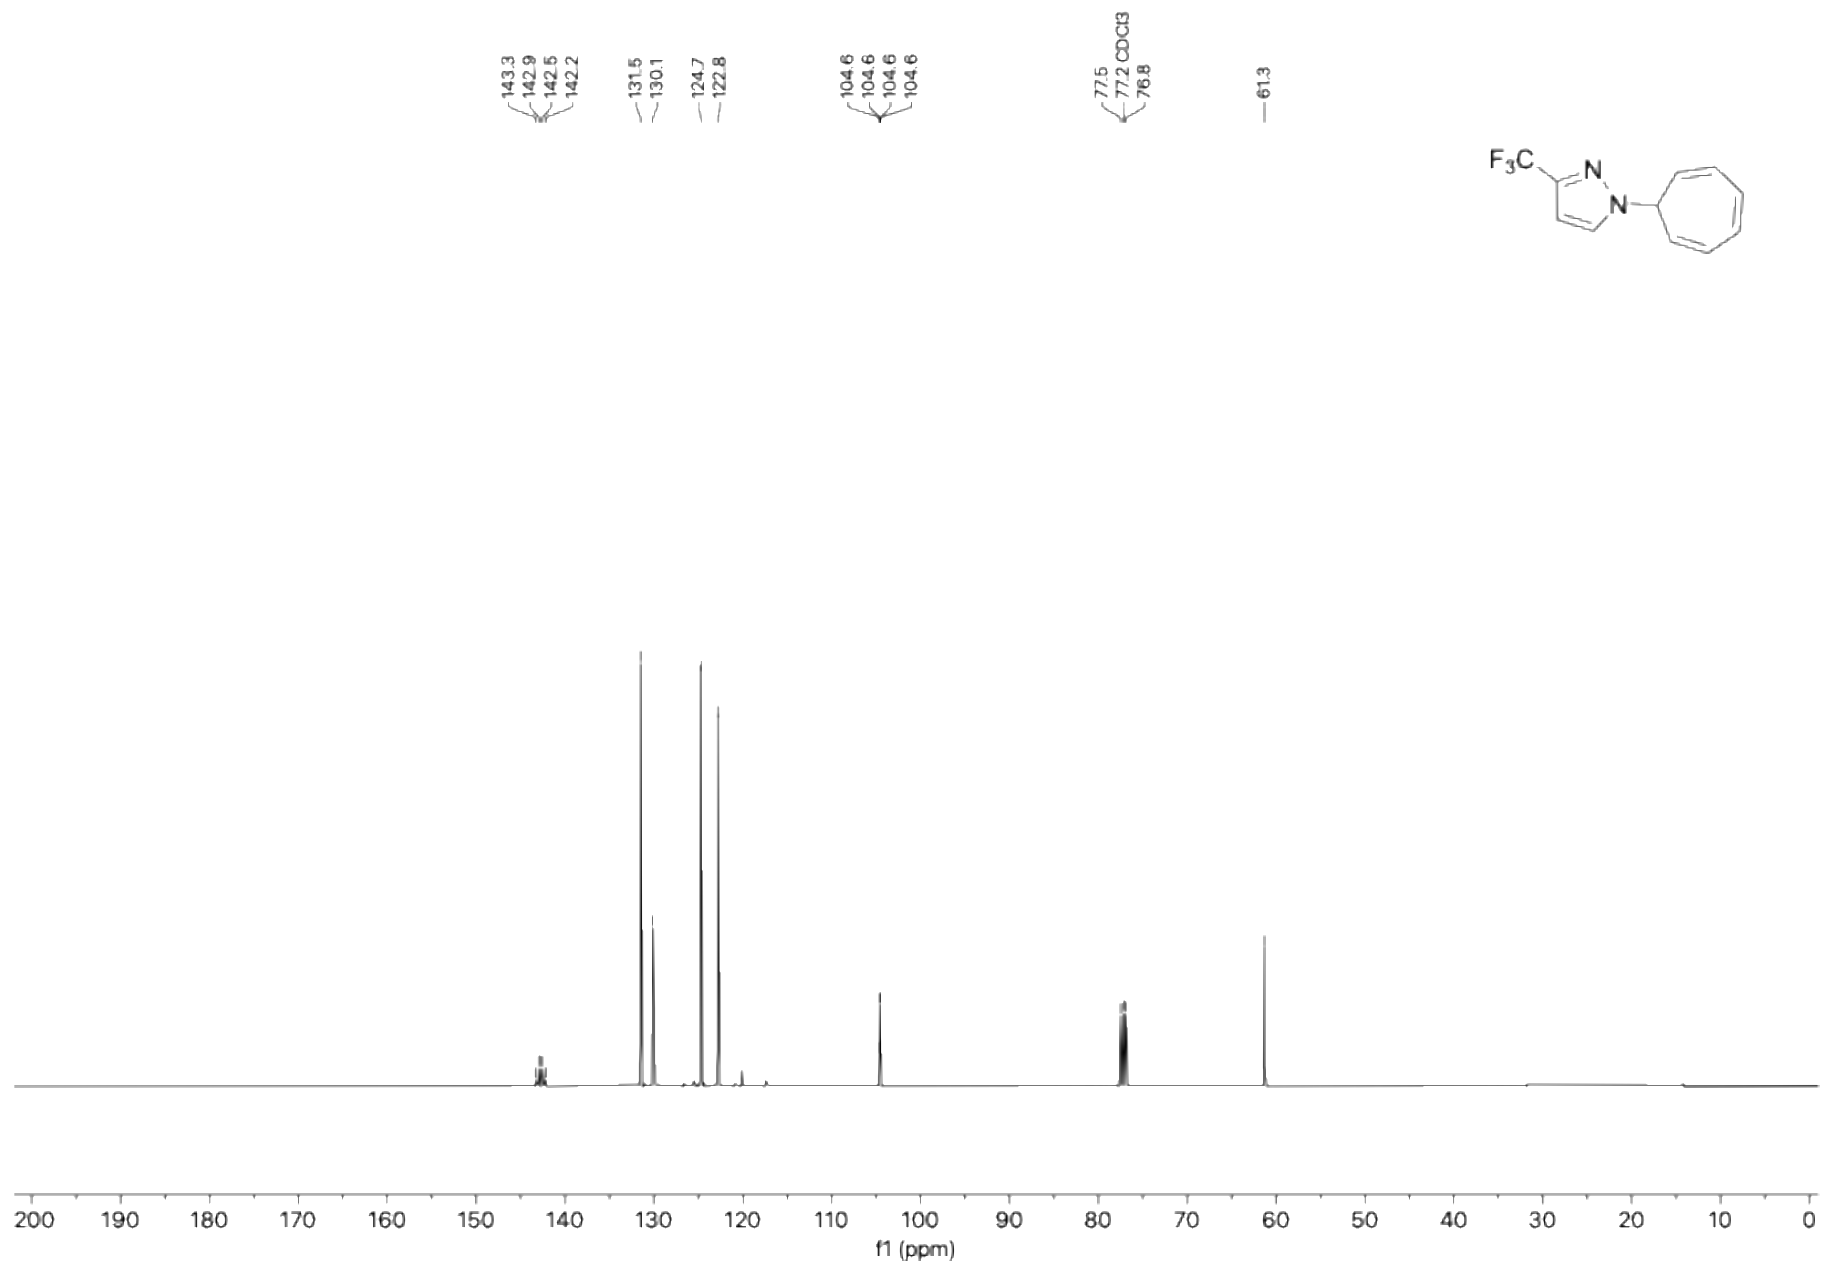

<sup>19</sup>F-NMR (376 MHz CDCl<sub>3</sub>) 3-Trifluoromethyl-1-(cyclohepta-2,4,6-trien-1-yl)-1H-pyrazole (7b)

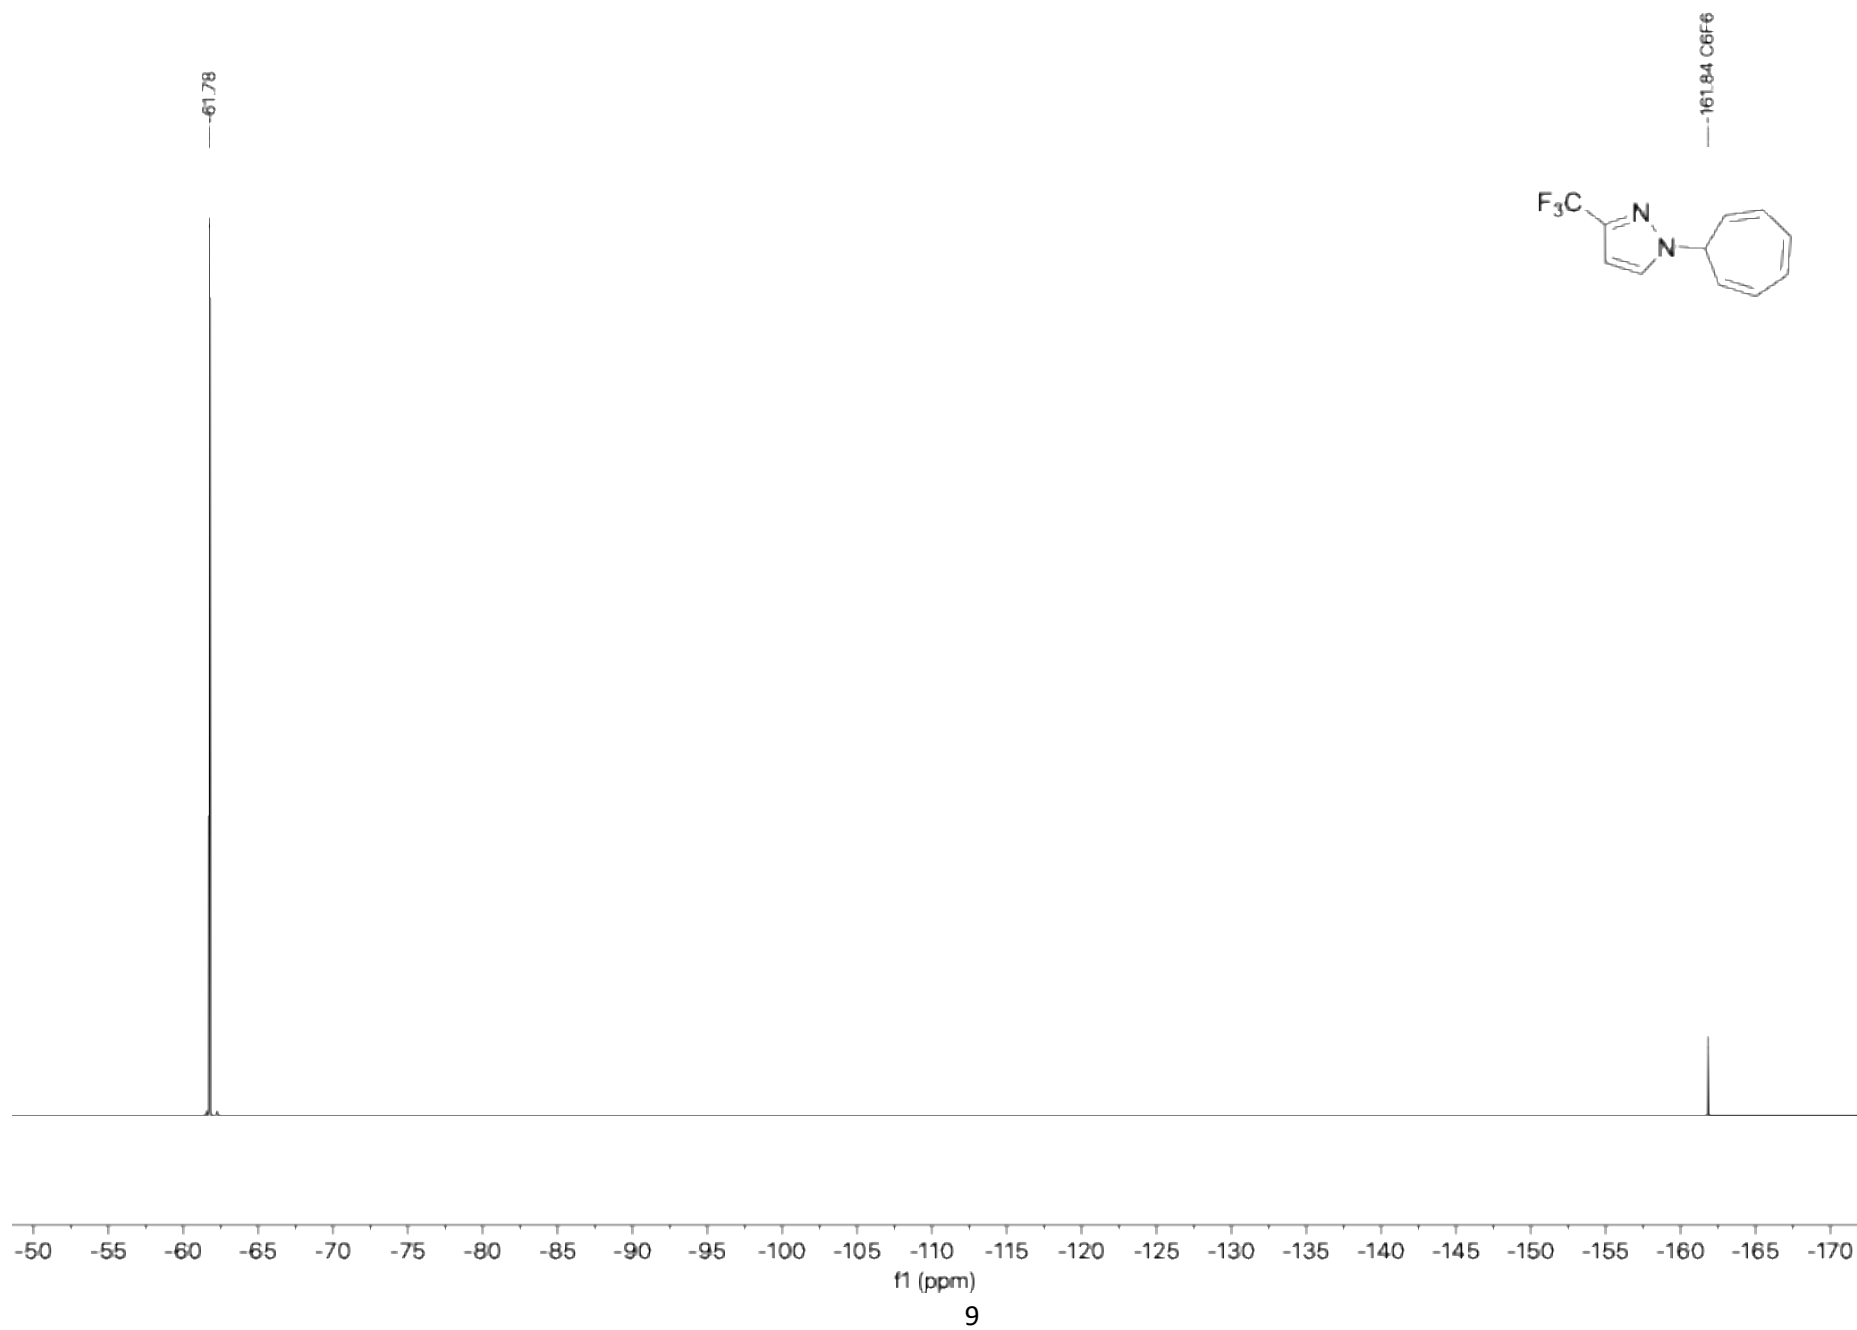

<sup>1</sup>H-NMR (400 MHz CDCl<sub>3</sub>) 3-Phenyl-1-(cyclohepta-2,4,6-trien-1-yl)-1H-pyrazole (7c)

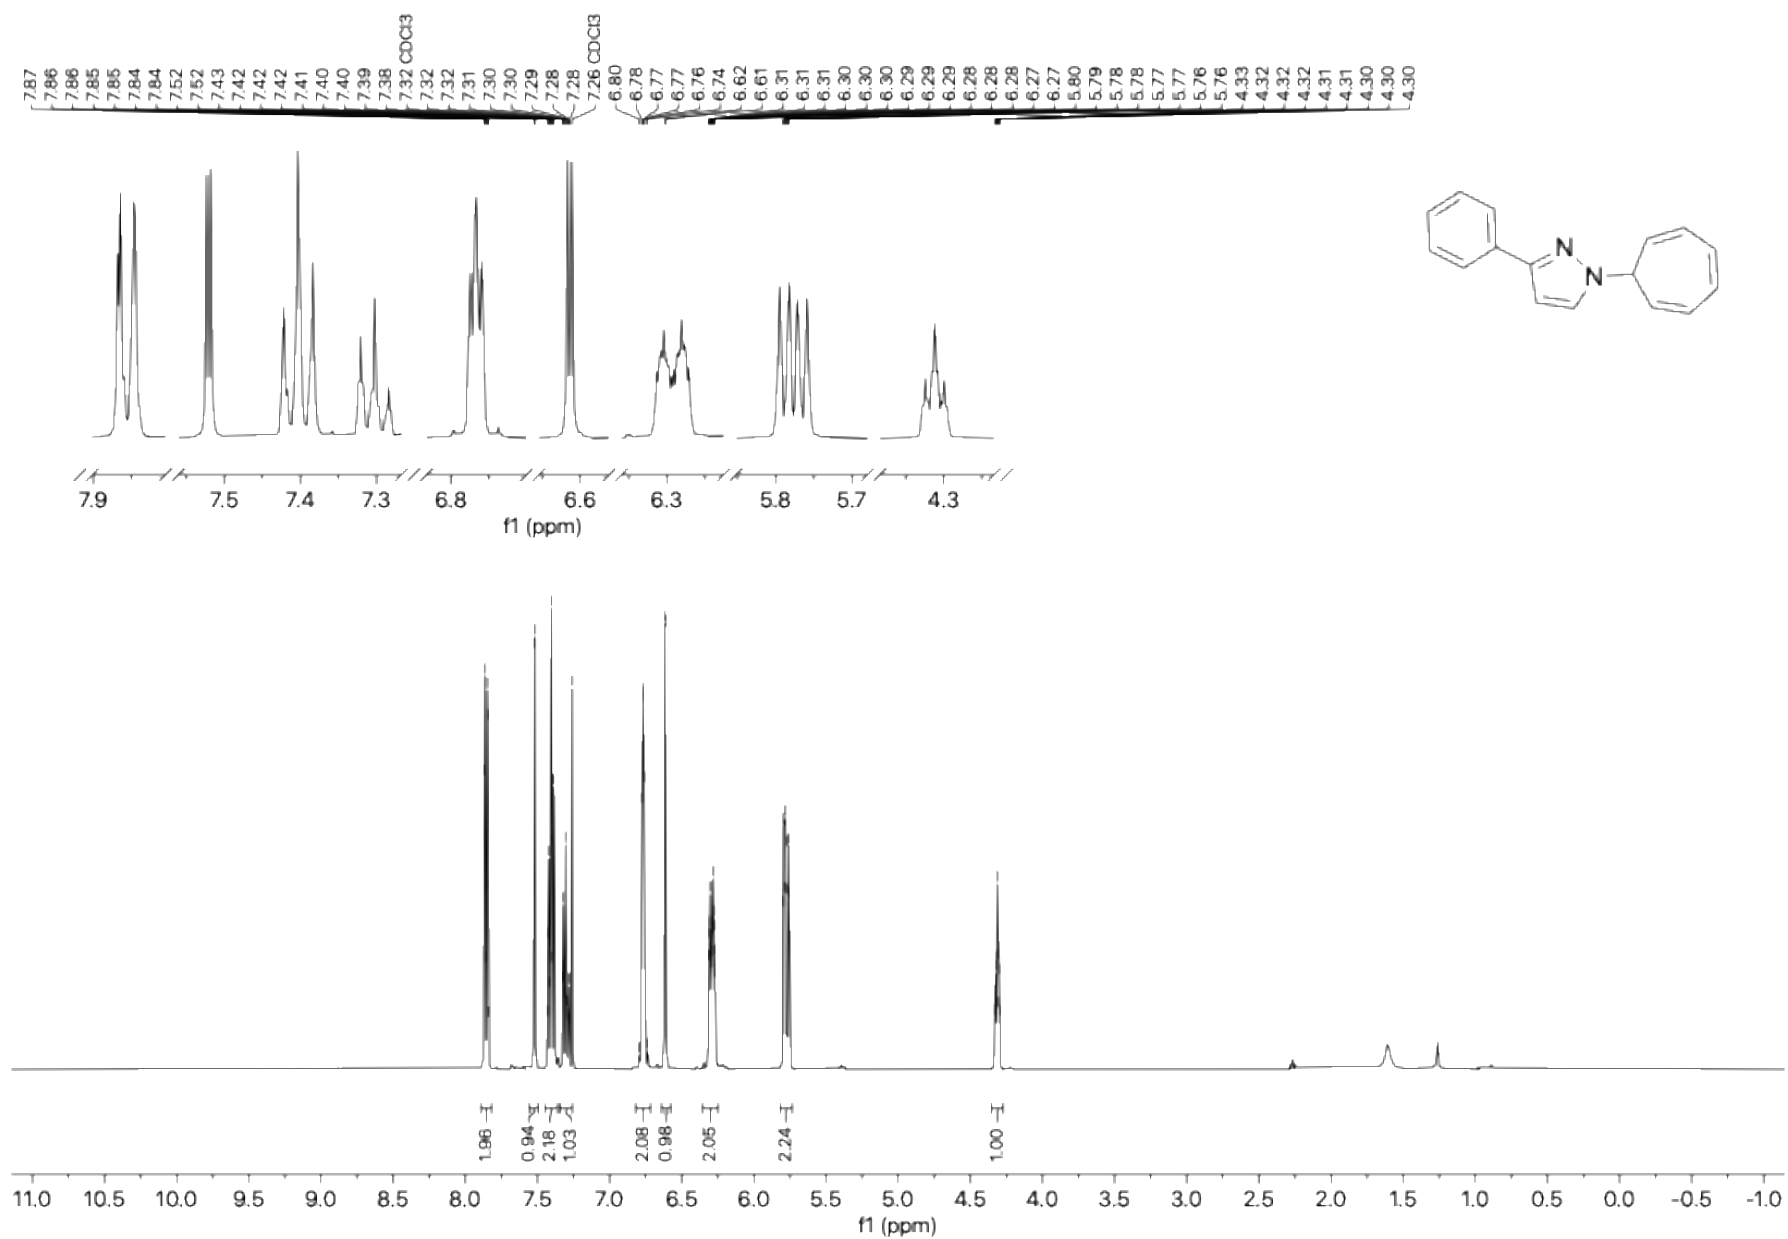

<sup>13</sup>C-NMR (101 MHz CDCl<sub>3</sub>) 3-Phenyl-1-(cyclohepta-2,4,6-trien-1-yl)-1H-pyrazole (7c)

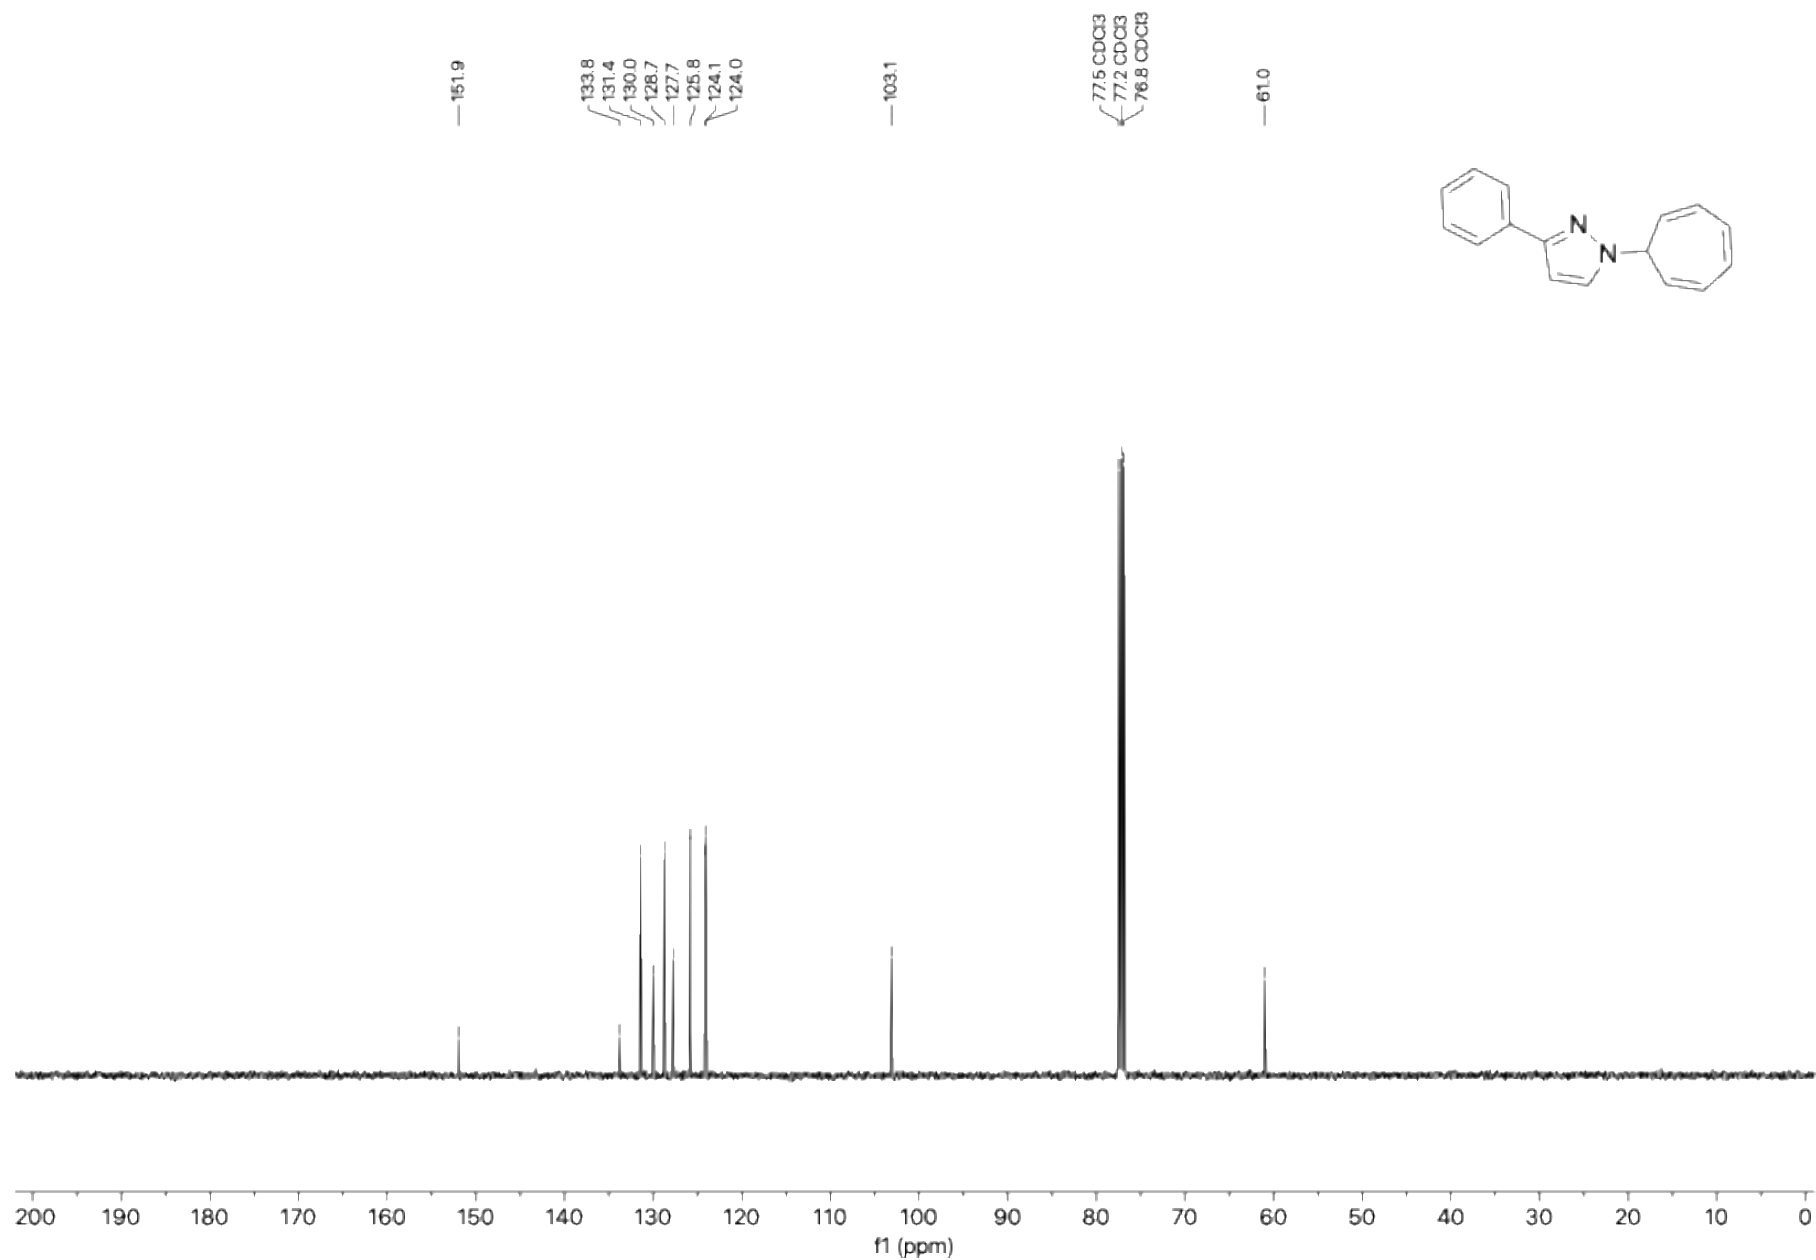

<sup>1</sup>H-NMR (400 MHz CDCl<sub>3</sub>) 4-Methyl-1-(cyclohepta-2,4,6-trien-1-yl)-1H-pyrazole (7d)

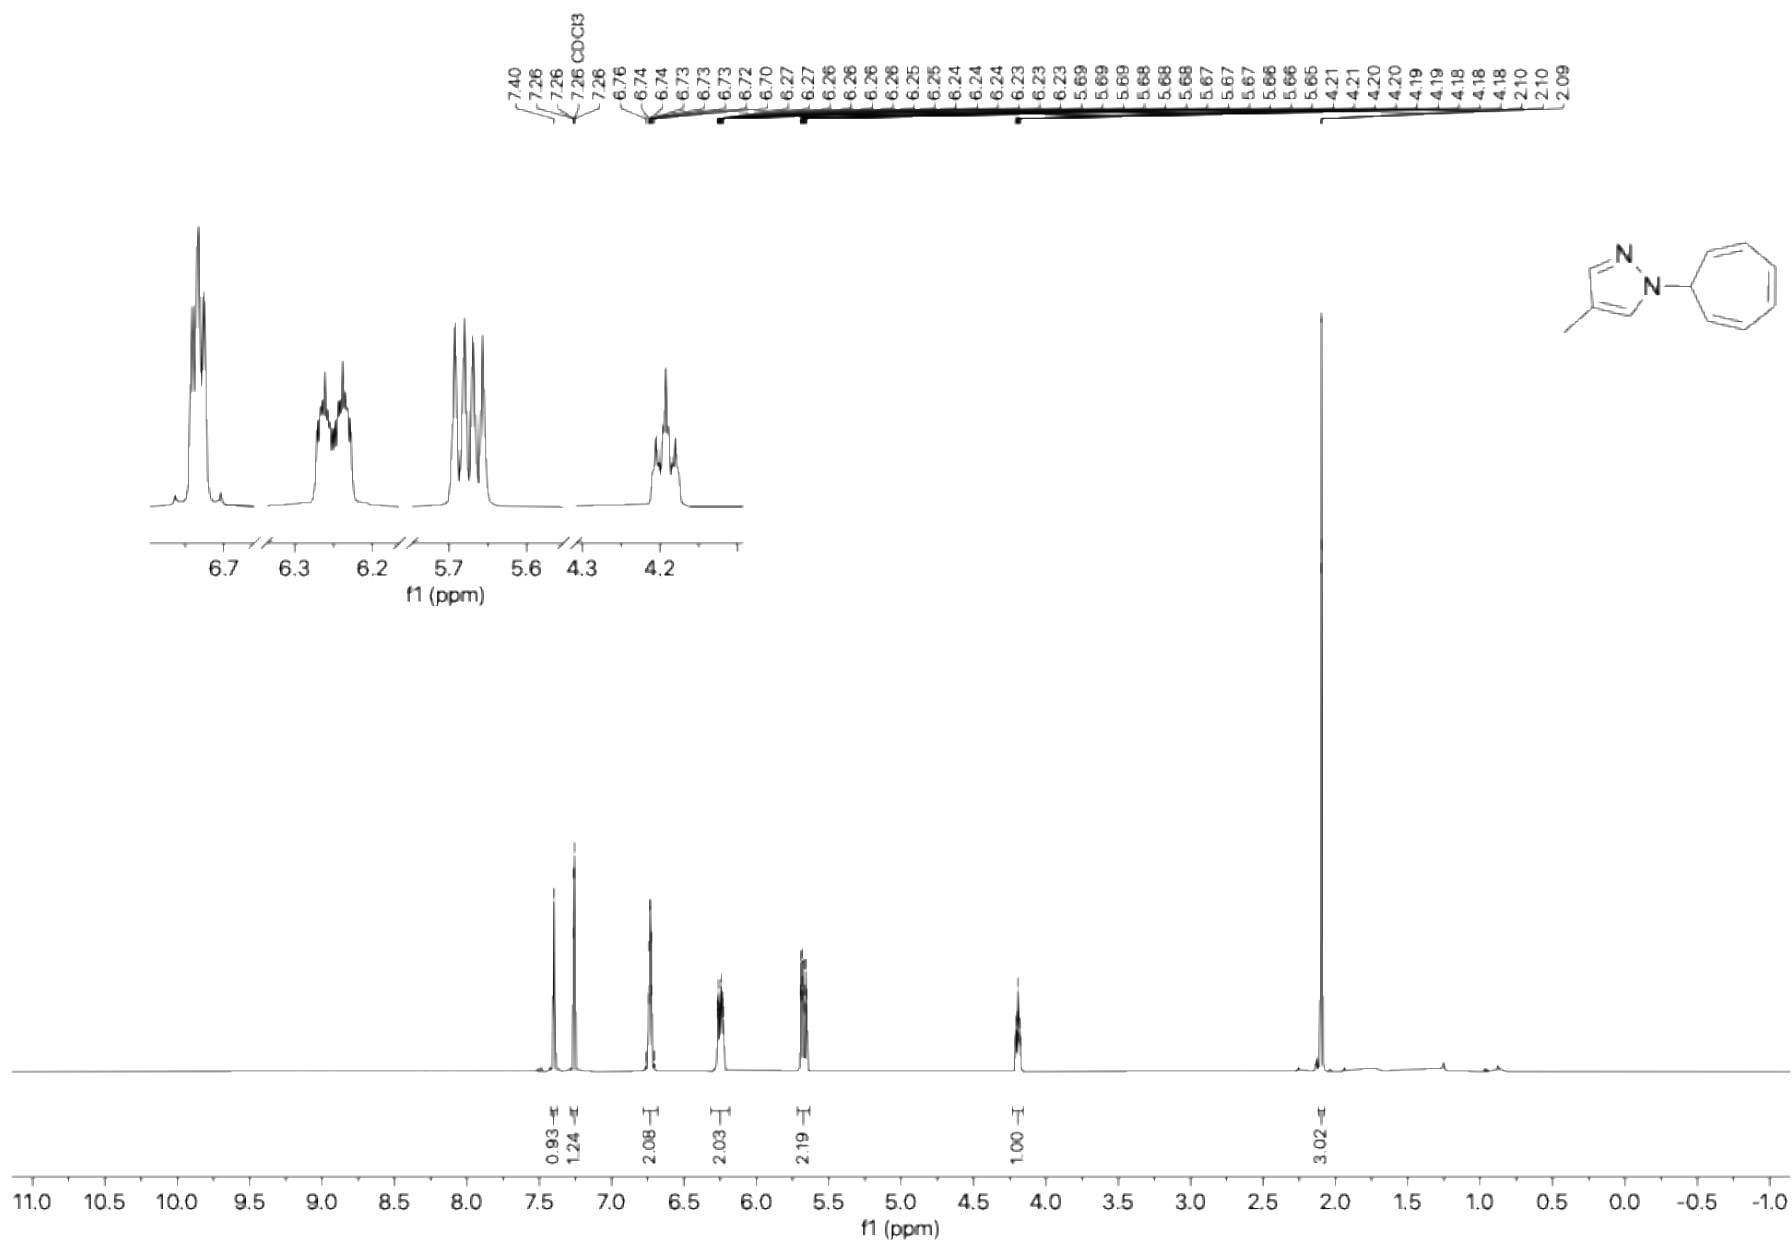

<sup>13</sup>C-NMR (101 MHz CDCl<sub>3</sub>) 4-Methyl-1-(cyclohepta-2,4,6-trien-1-yl)-1H-pyrazole (7d)

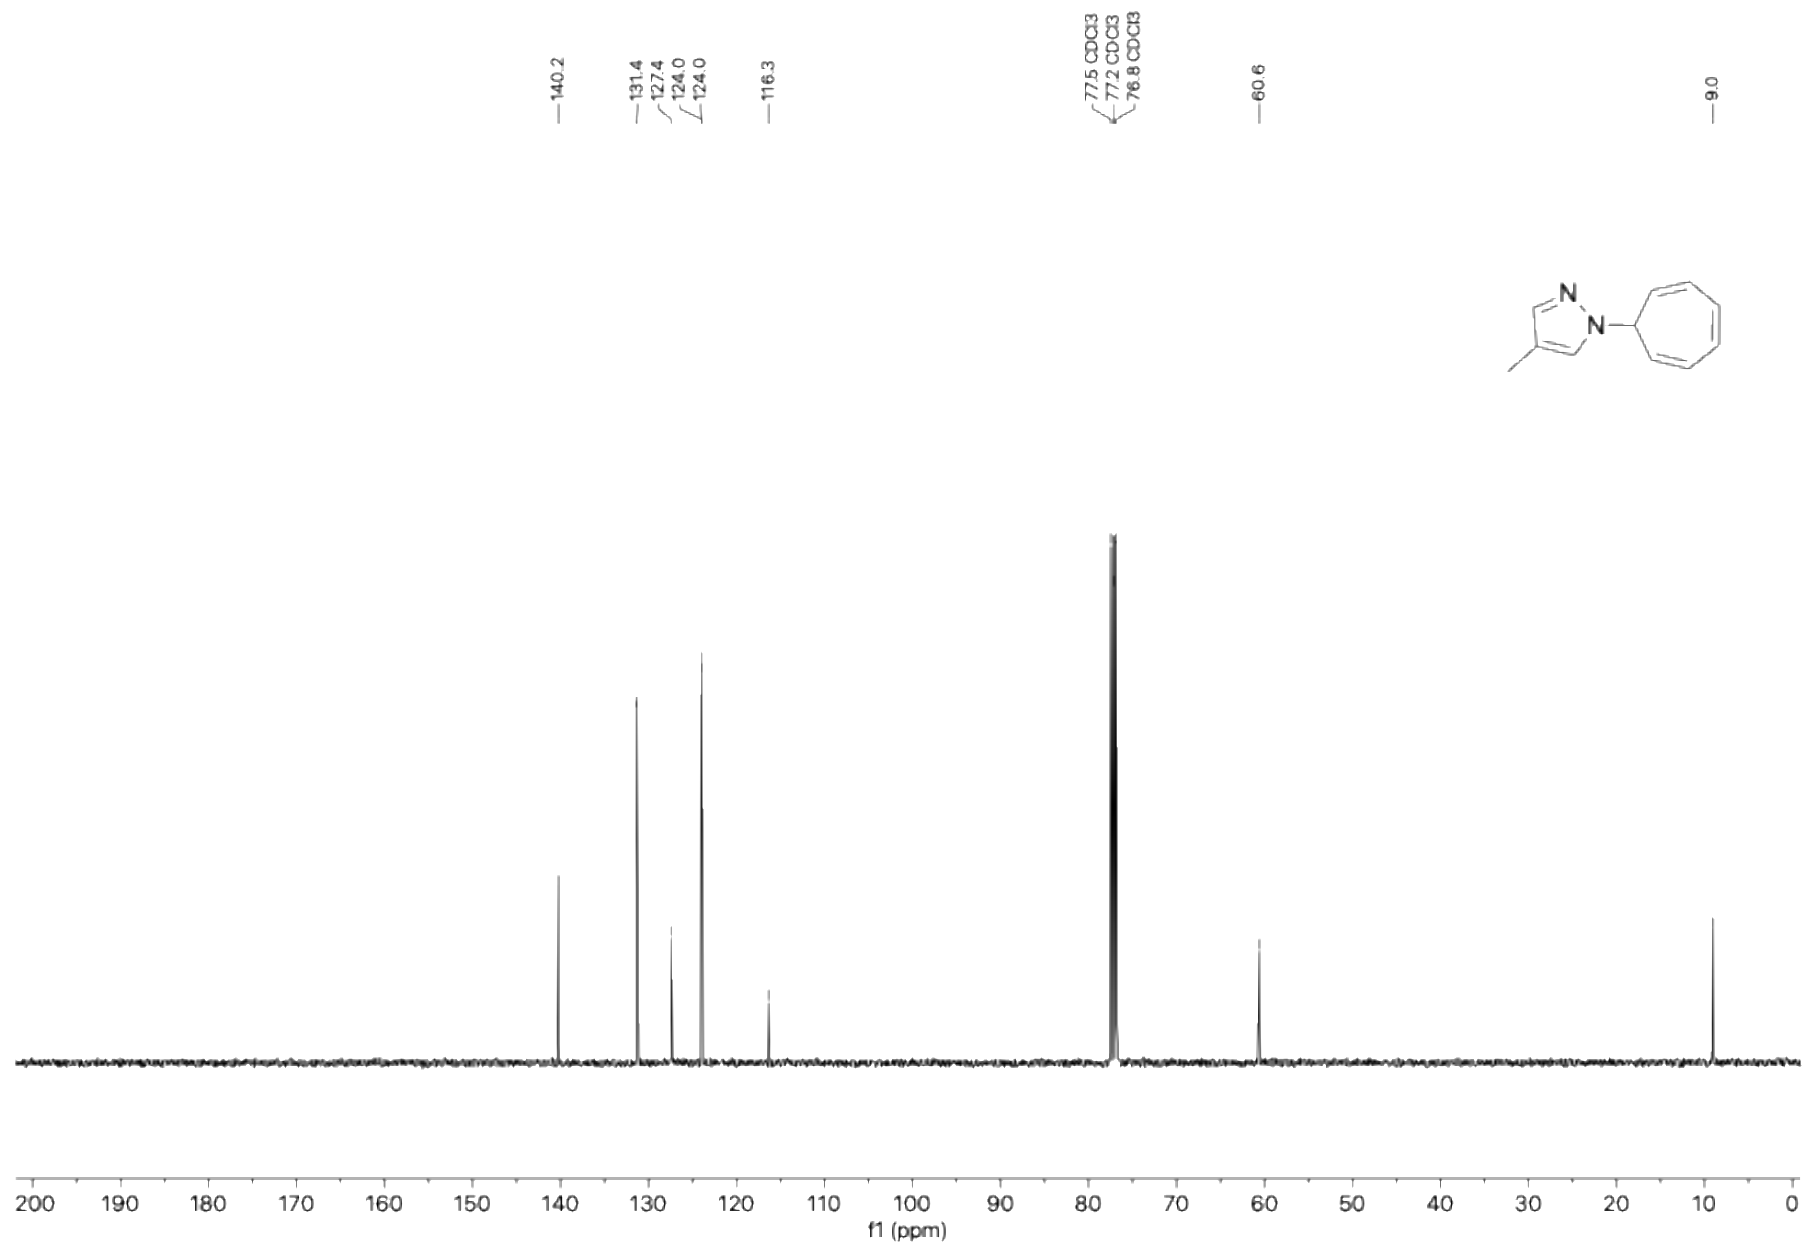

<sup>1</sup>H-NMR (400 MHz CDCl<sub>3</sub>) 4-Chloro-(cyclohepta-2,4,6-trien-1-yl)-1H-pyrazole (7e)

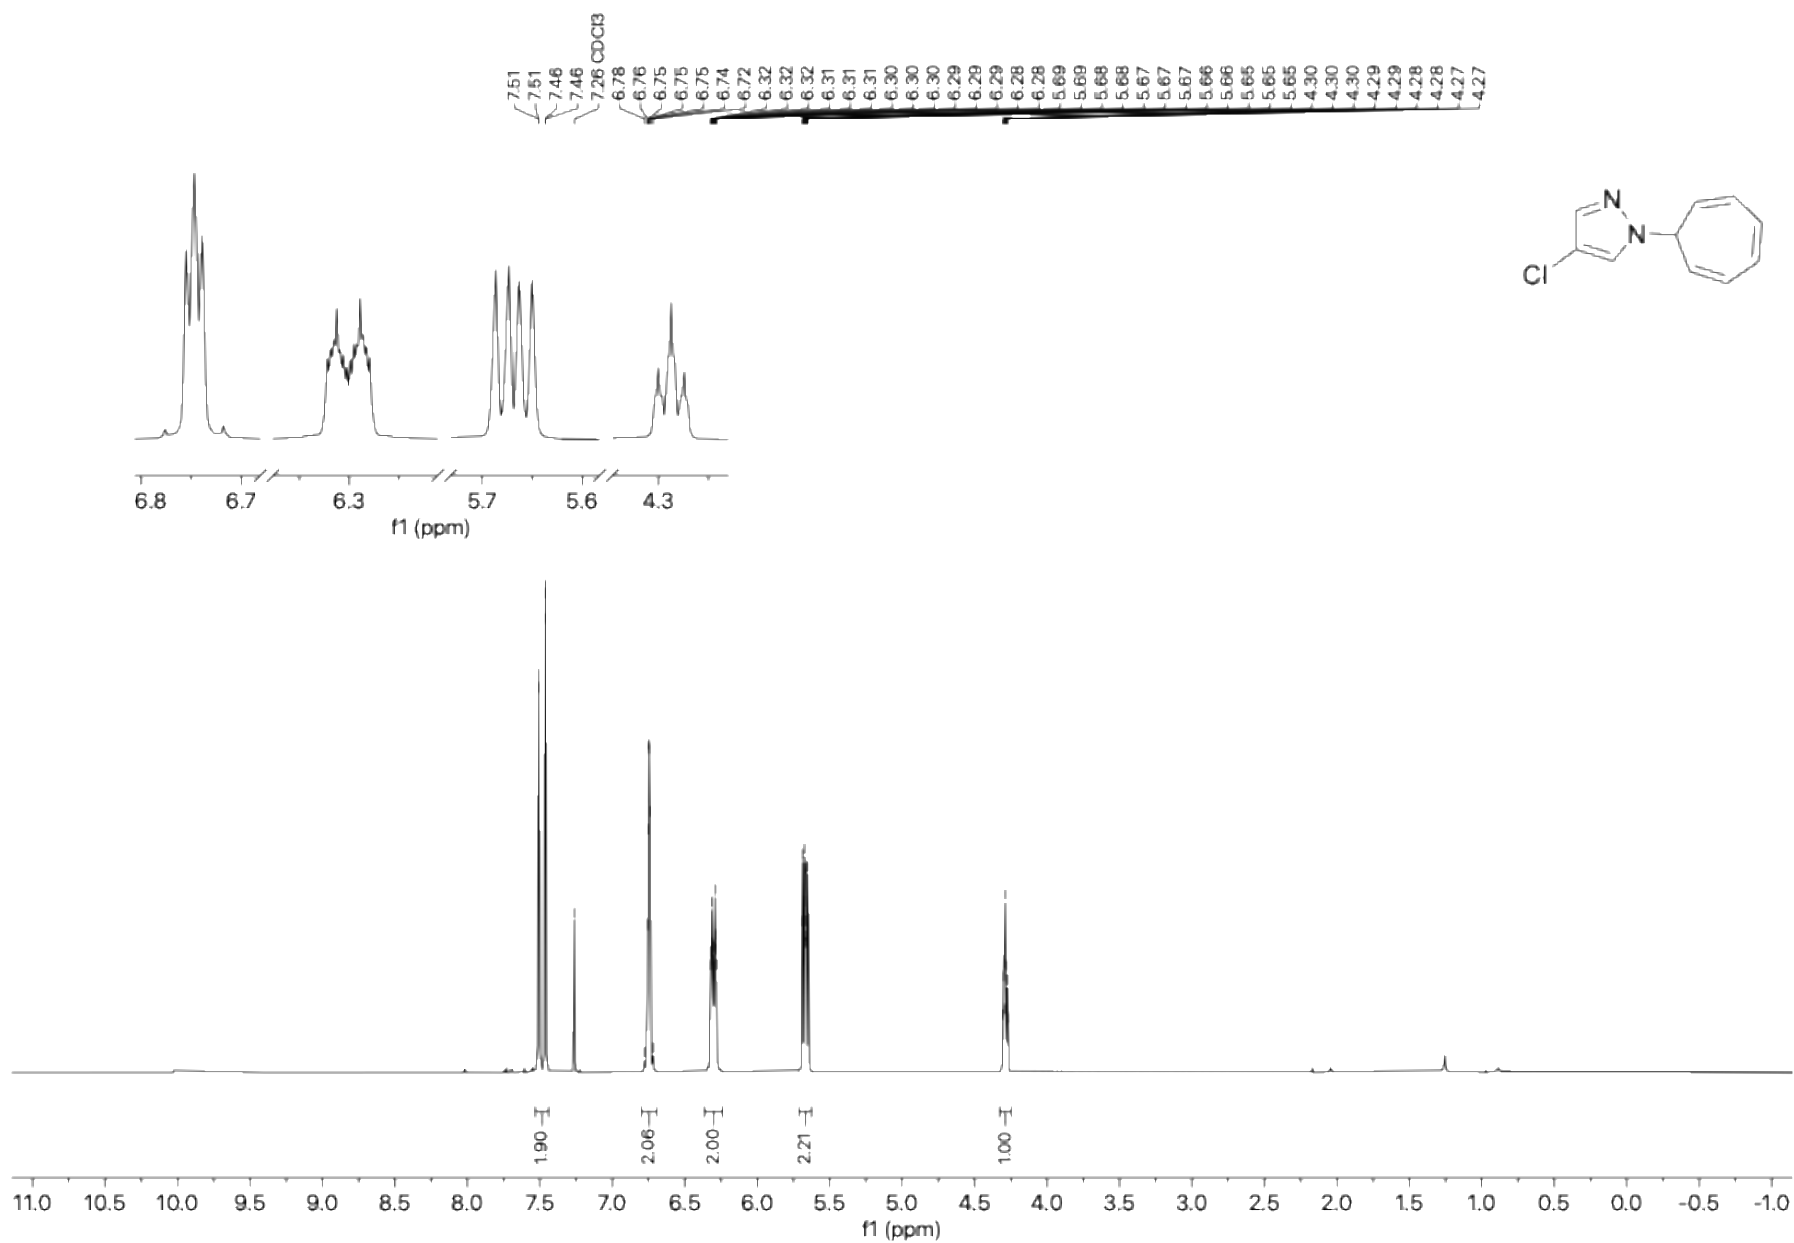

$^{13}\text{C}$ -NMR (101 MHz  $\text{CDCl}_3$ ) 4-Chloro-(cyclohepta-2,4,6-trien-1-yl)-1H-pyrazole (7e)

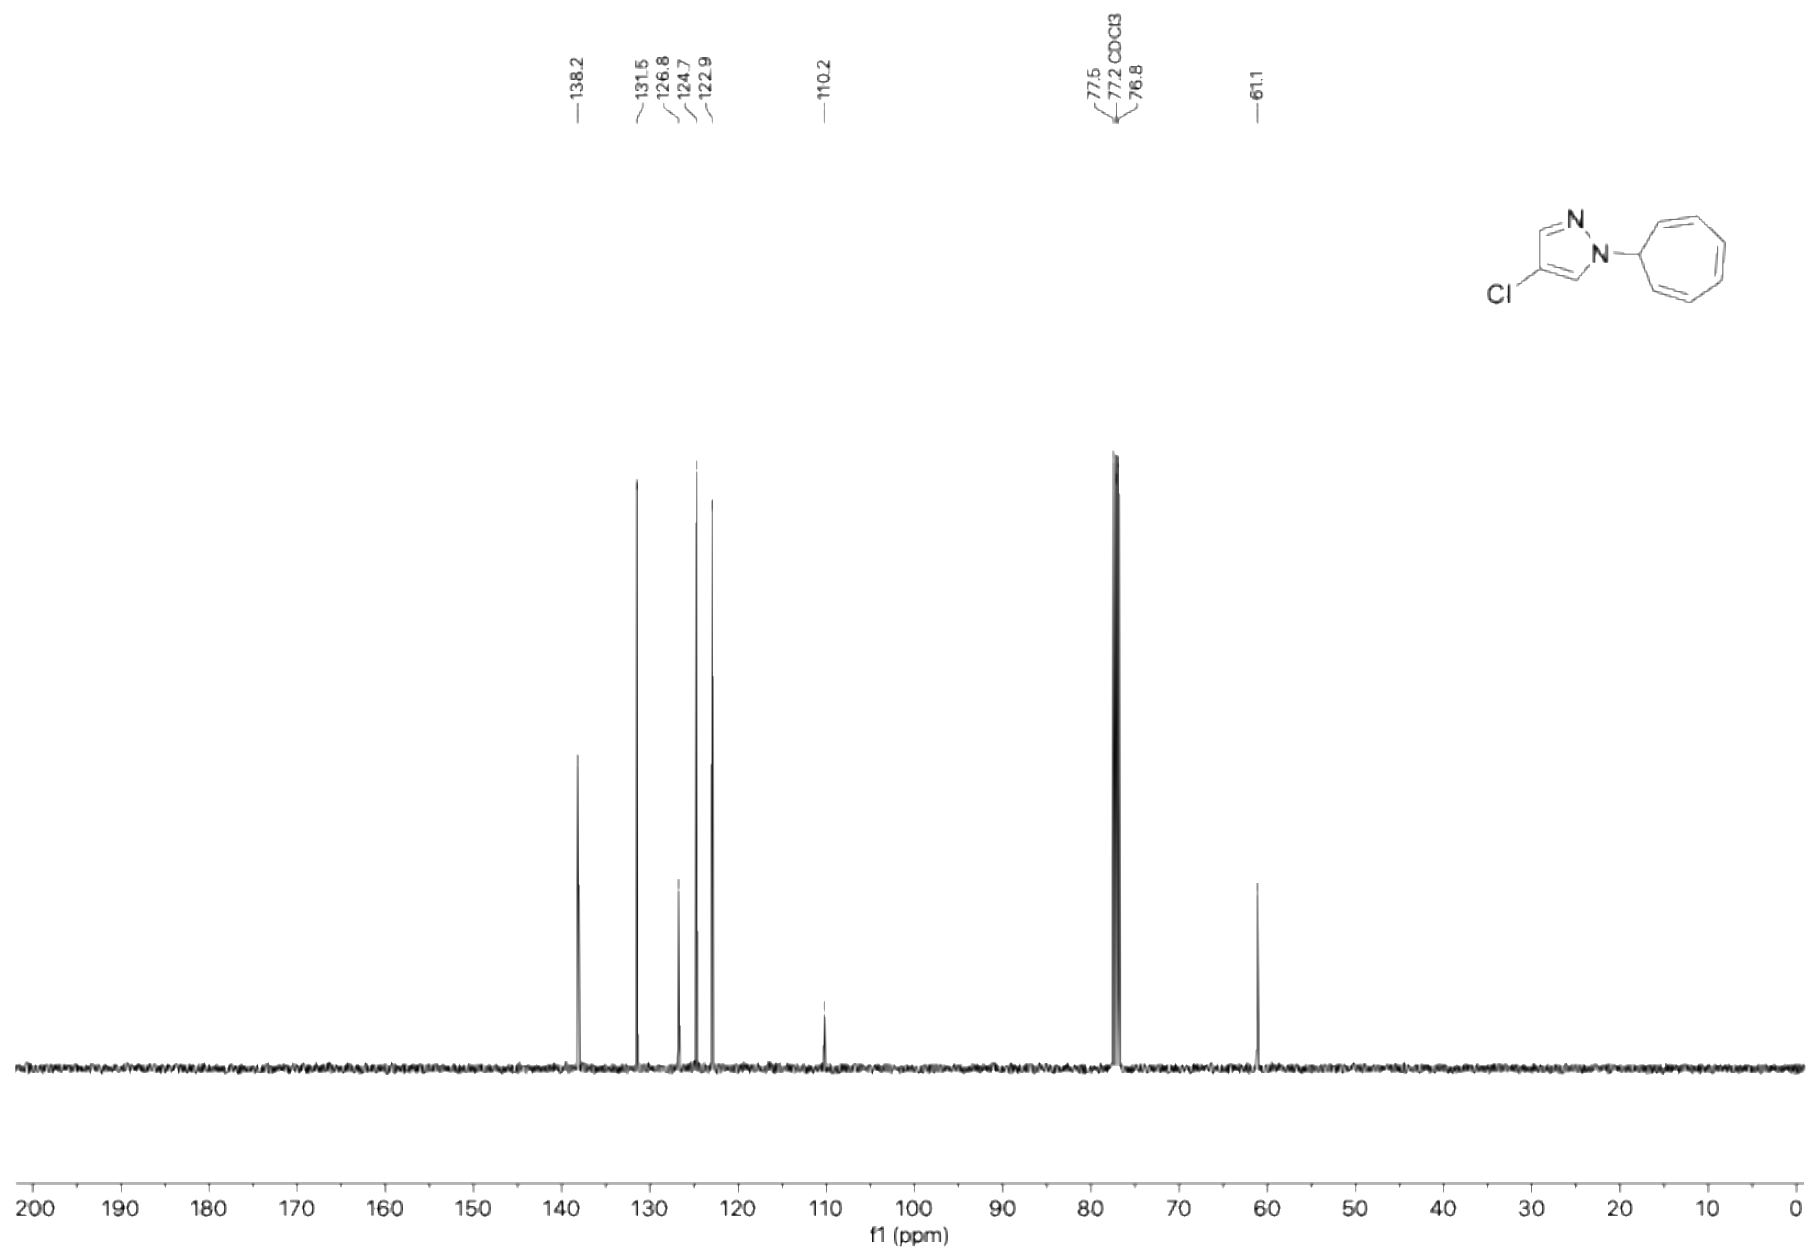

<sup>1</sup>H-NMR (400 MHz CDCl<sub>3</sub>) 4-Bromo-1-(cyclohepta-2,4,6-trien-1-yl)-1H-pyrazole (7f)

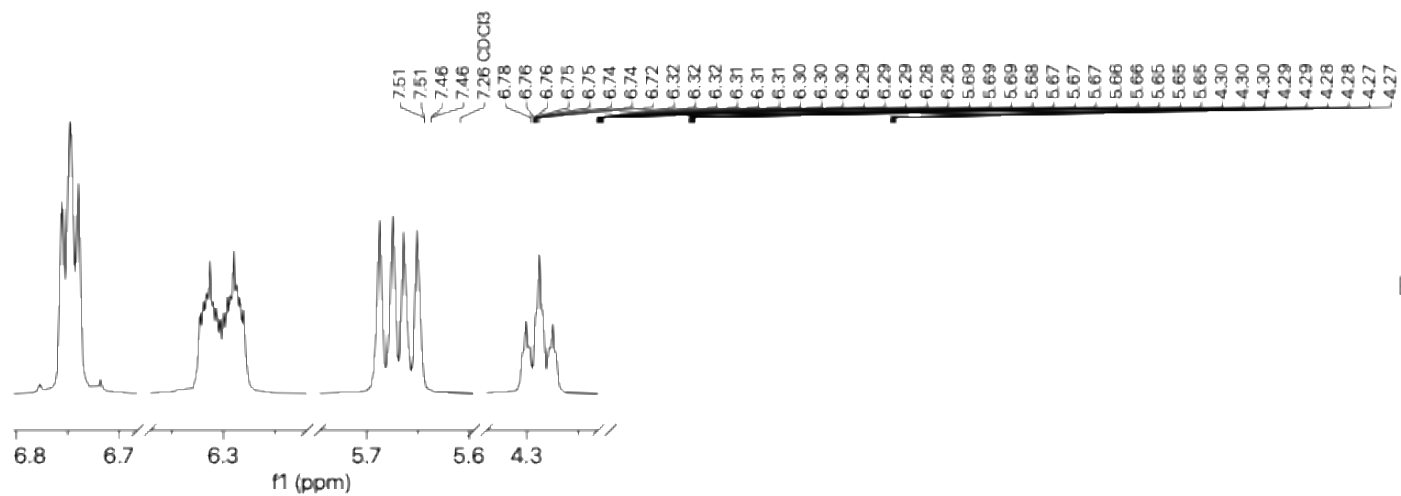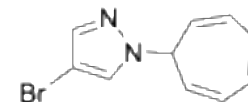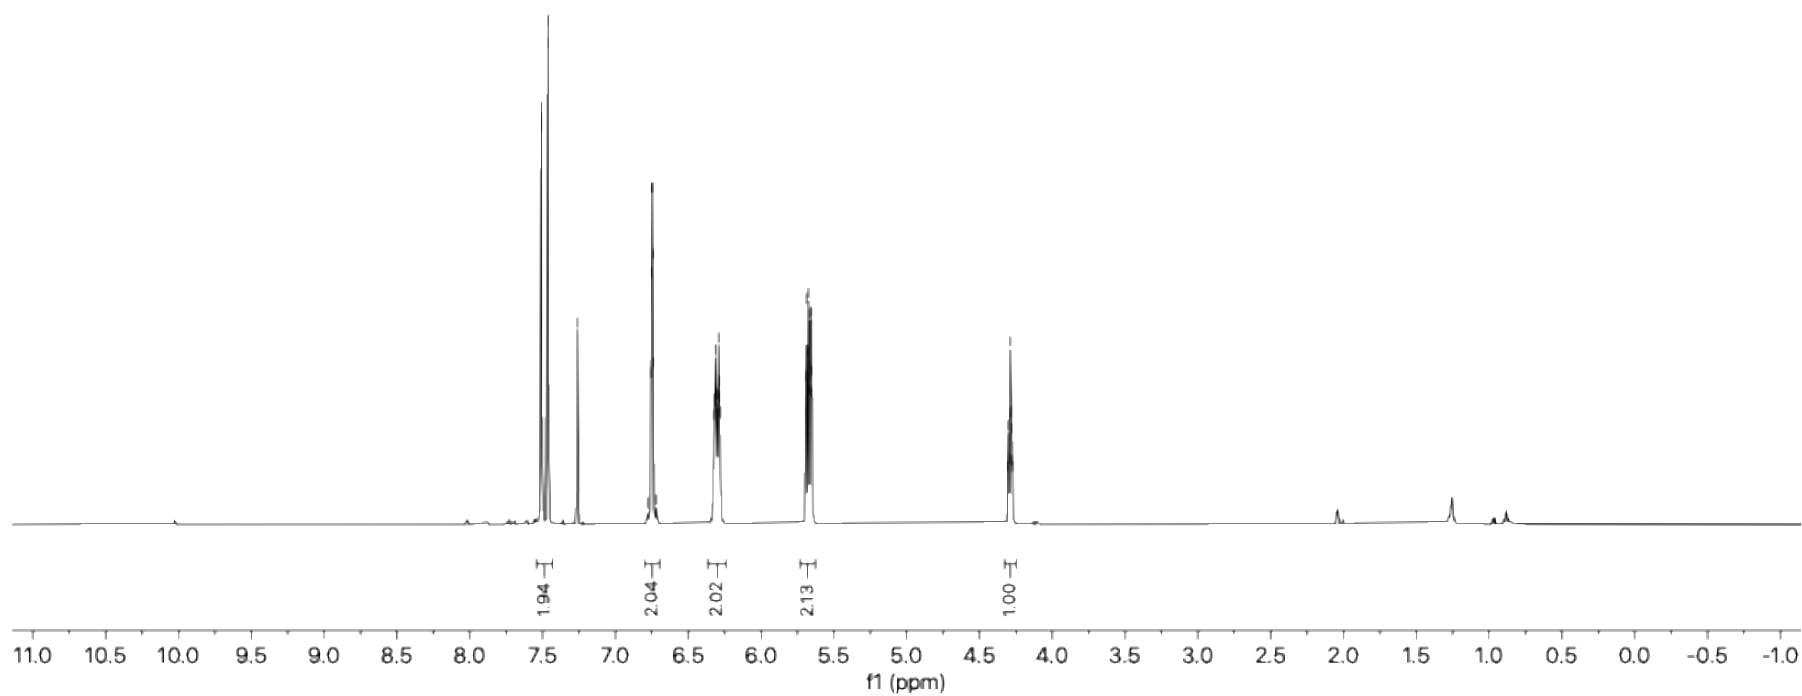

$^{13}\text{C}$ -NMR (101 MHz  $\text{CDCl}_3$ ) 4-Bromo-1-(cyclohepta-2,4,6-trien-1-yl)-1H-pyrazole (7f)

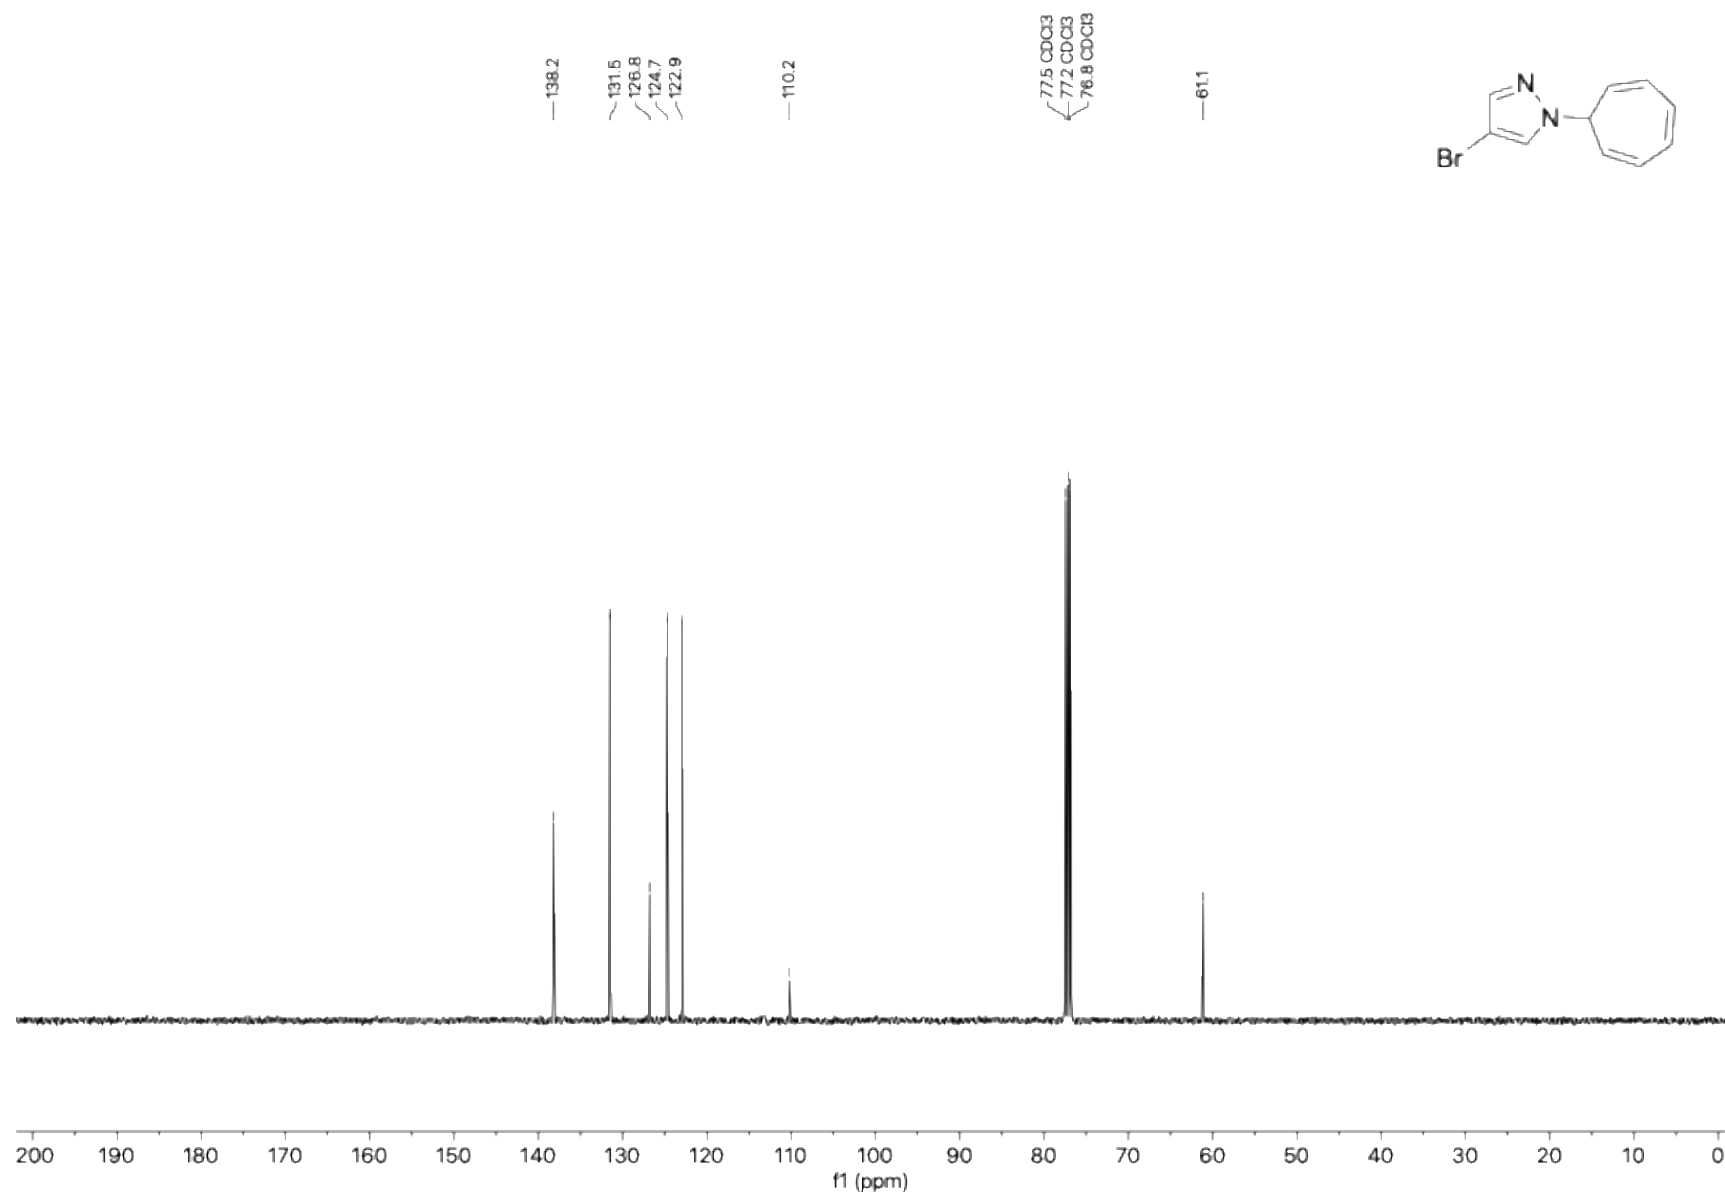

<sup>1</sup>H-NMR (400 MHz CDCl<sub>3</sub>) **1-(Cyclohepta-2,4,6-trien-1-yl)-3-methyl-5-(trifluoromethyl)-1H-pyrazole (7g)**

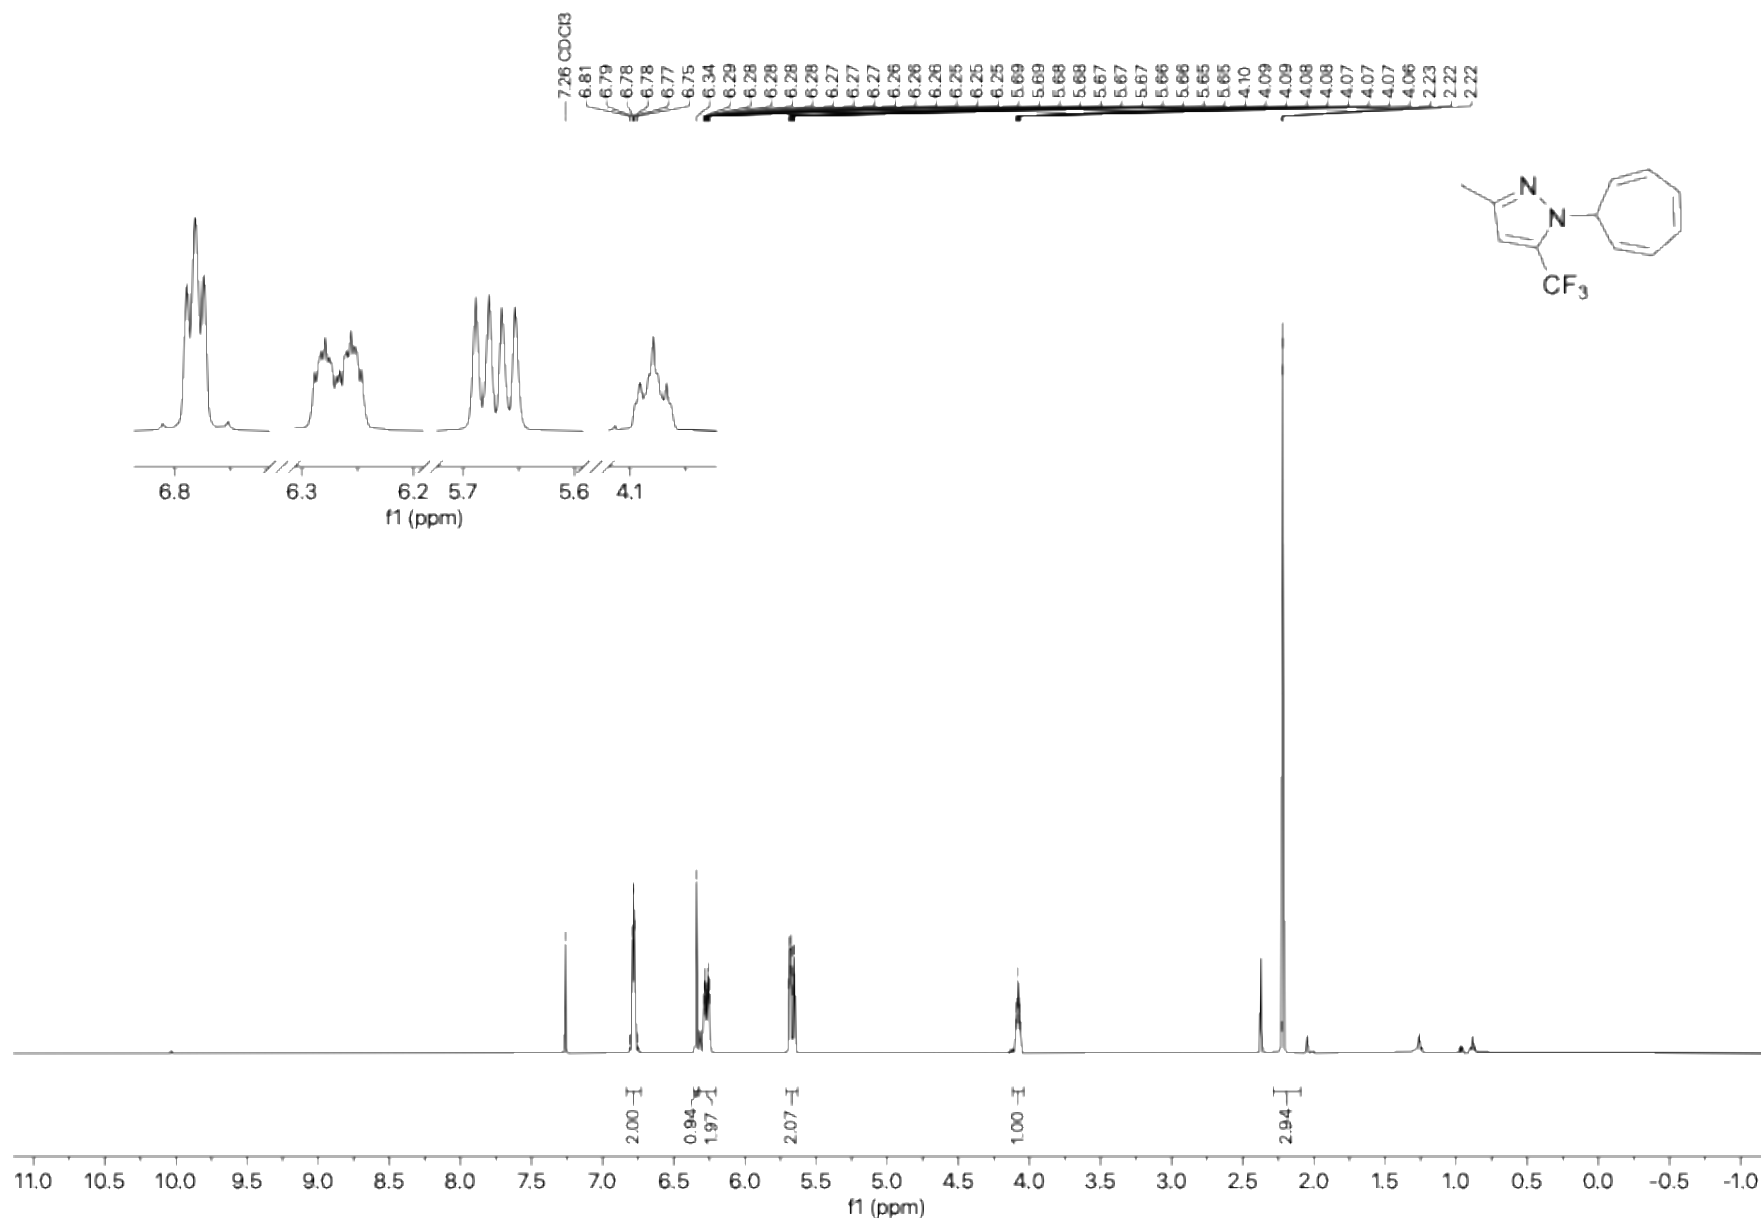

<sup>13</sup>C-NMR (101 MHz CDCl<sub>3</sub>) **1-(Cyclohepta-2,4,6-trien-1-yl)-3-methyl-5-(trifluoromethyl)-1H-pyrazole (7g)**

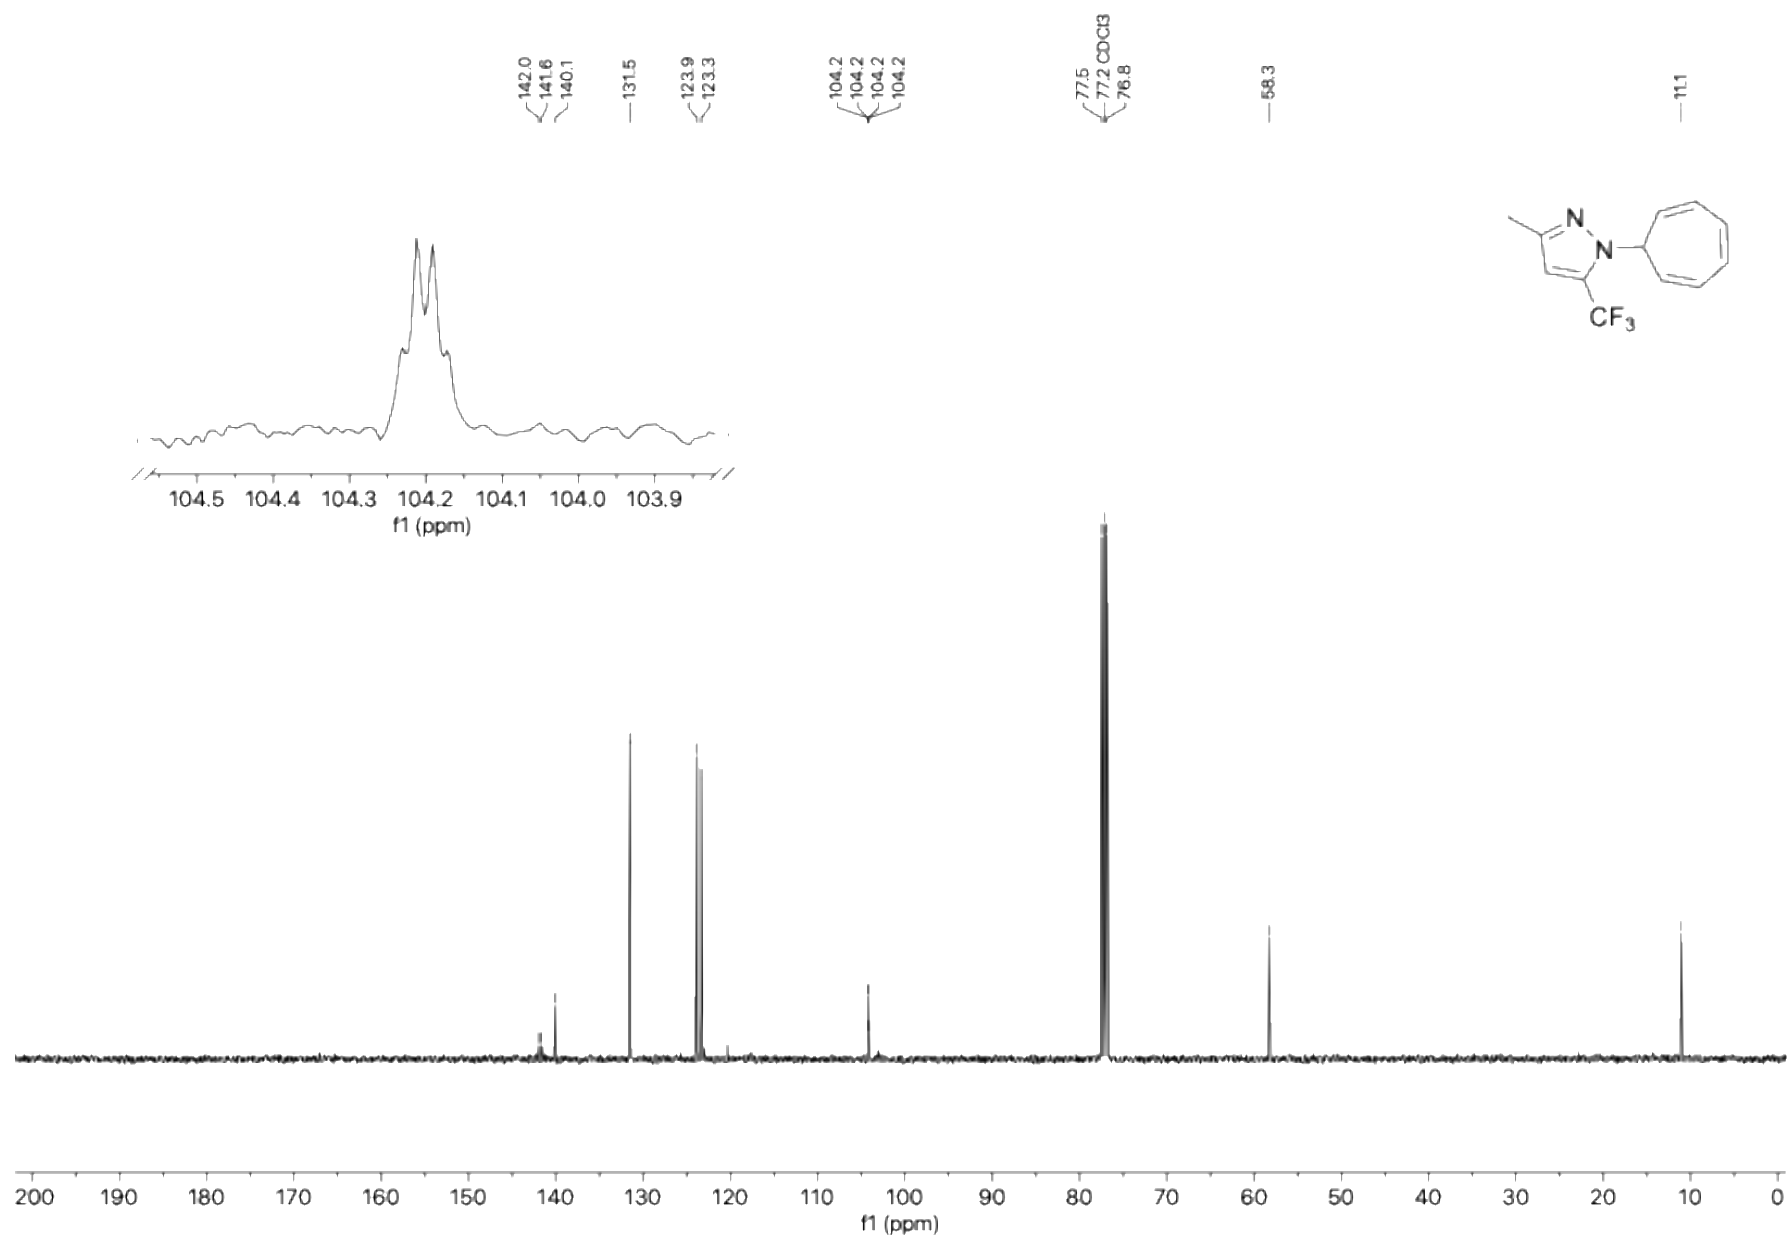

<sup>19</sup>F-NMR (376 MHz CDCl<sub>3</sub>) **1-(Cyclohepta-2,4,6-trien-1-yl)-3-methyl-5-(trifluoromethyl)-1H-pyrazole (7g)**

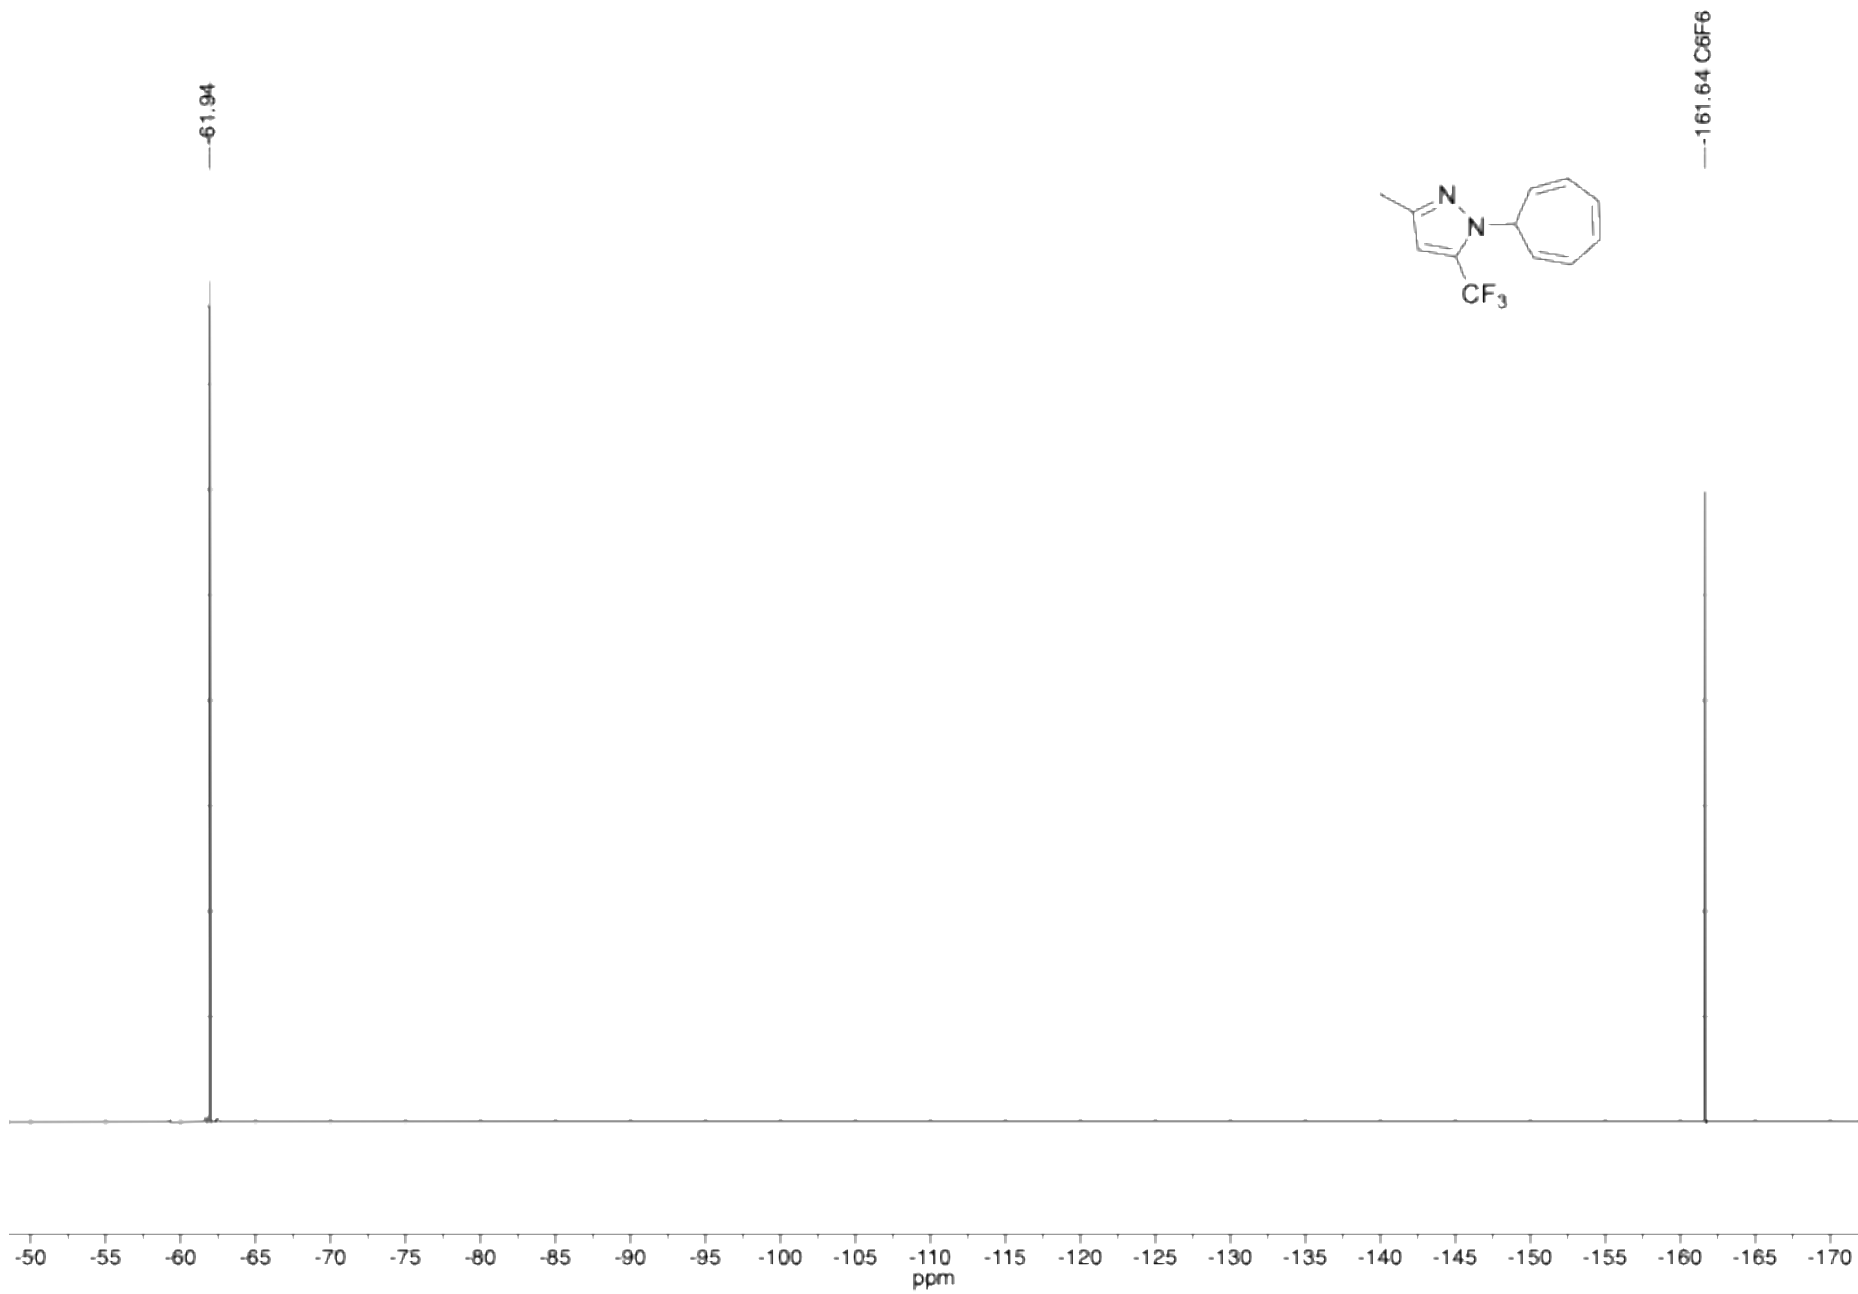

<sup>1</sup>H-NMR (400 MHz CDCl<sub>3</sub>) 1-(Cyclohepta-2,4,6-trien-1-yl)-1H-1,2,3-triazole (7h)

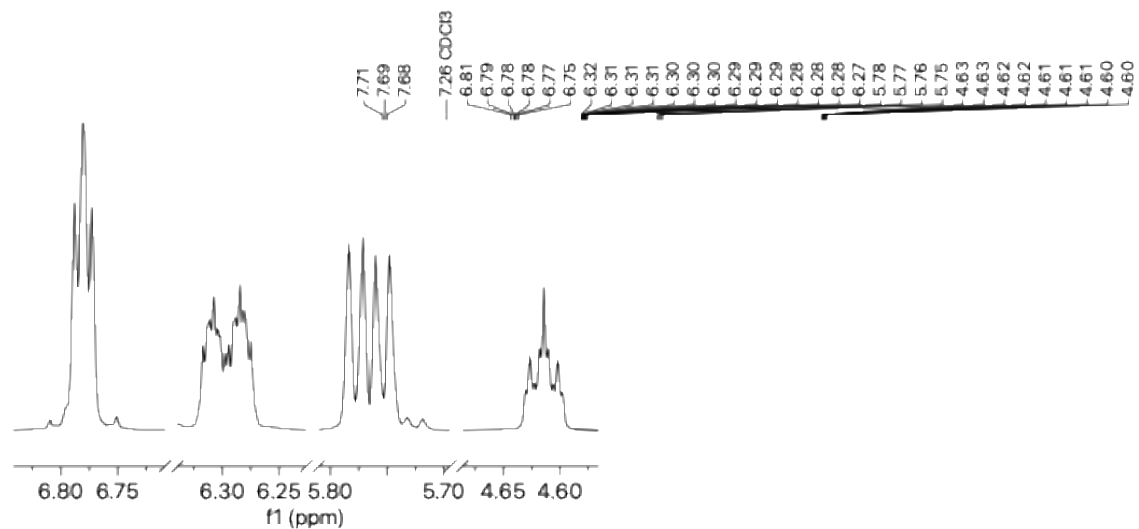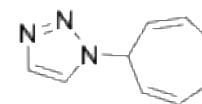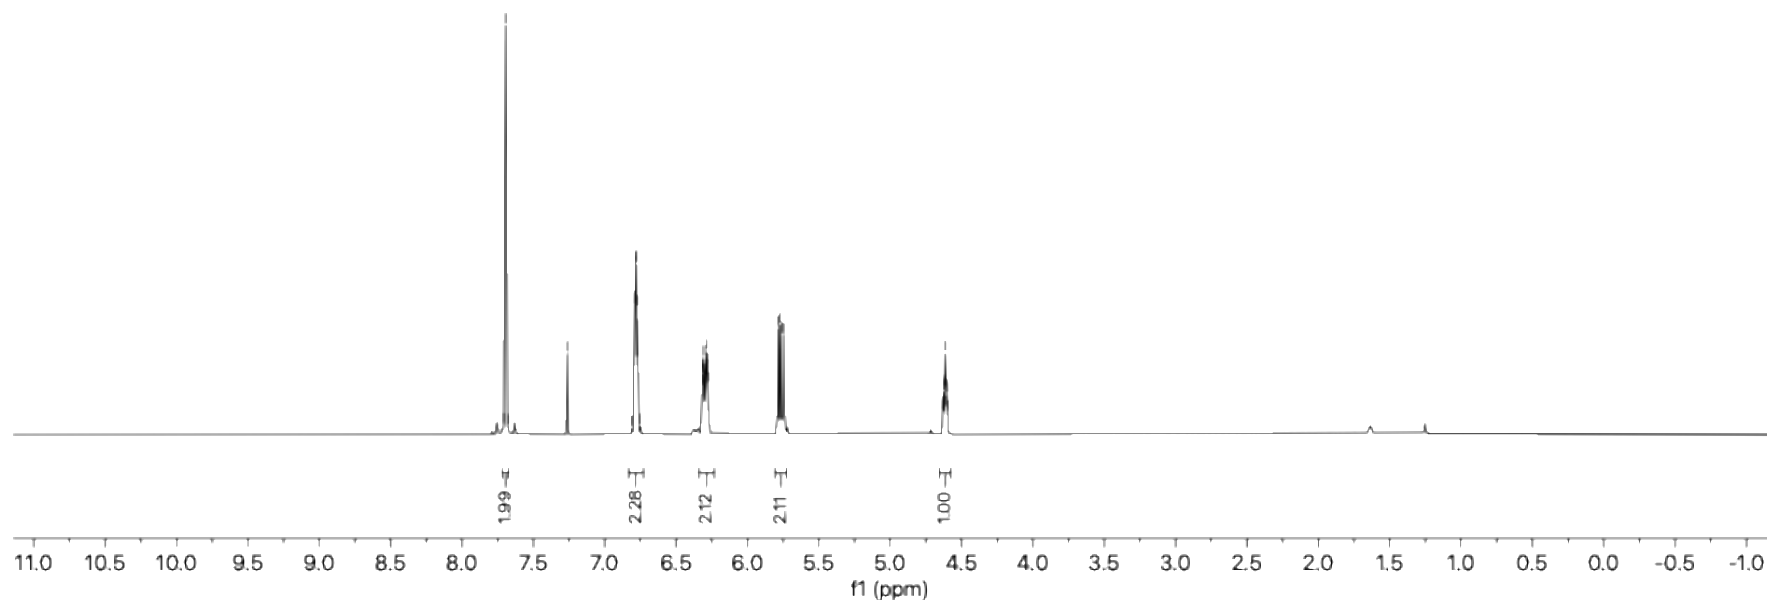

<sup>13</sup>C-NMR (101 MHz CDCl<sub>3</sub>) 1-(Cyclohepta-2,4,6-trien-1-yl)-1H-1,2,3-triazole (7h)

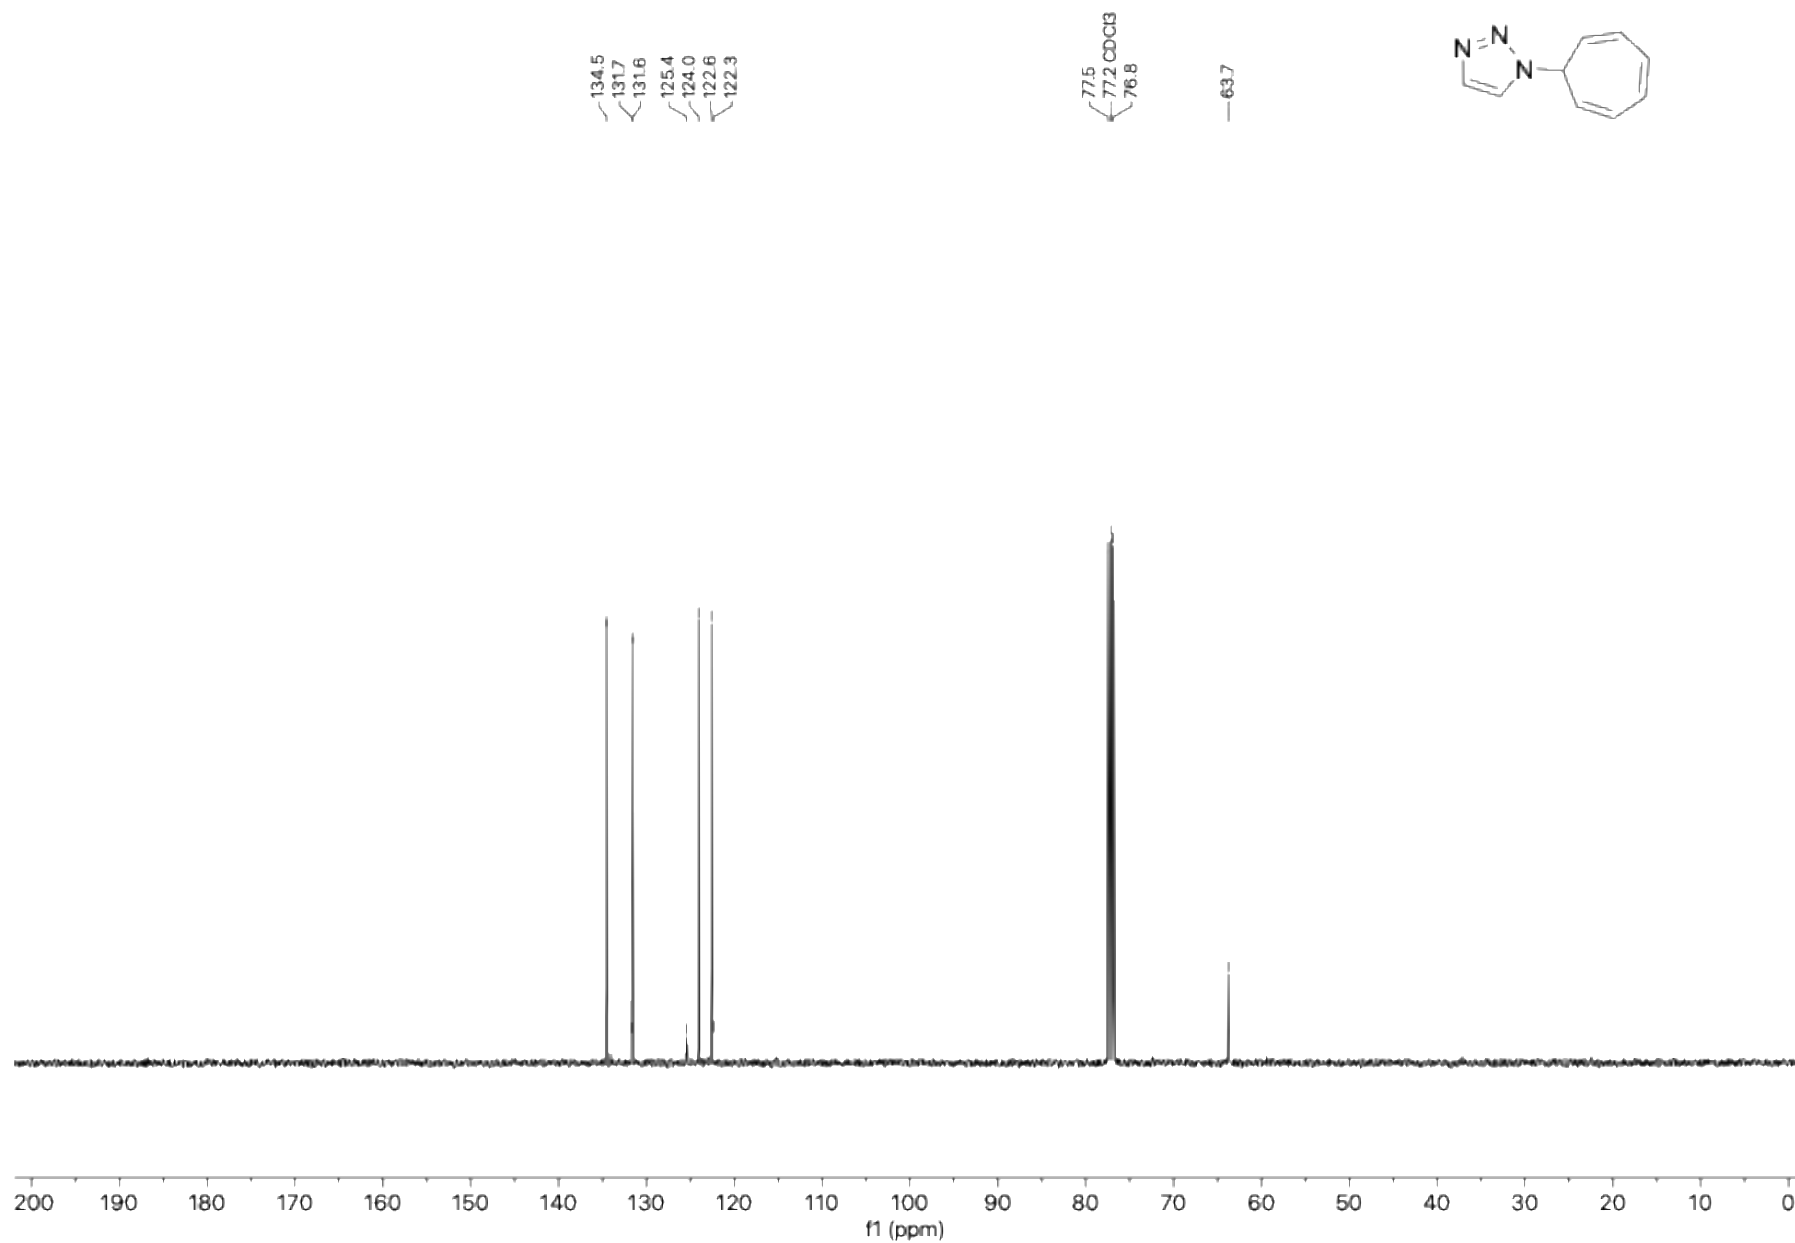

<sup>1</sup>H-NMR (400 MHz CDCl<sub>3</sub>) Crude NMR of 1-(Cyclohepta-2,4,6-trienyl-1-yl)-1H-1,2,4-triazole (7i)

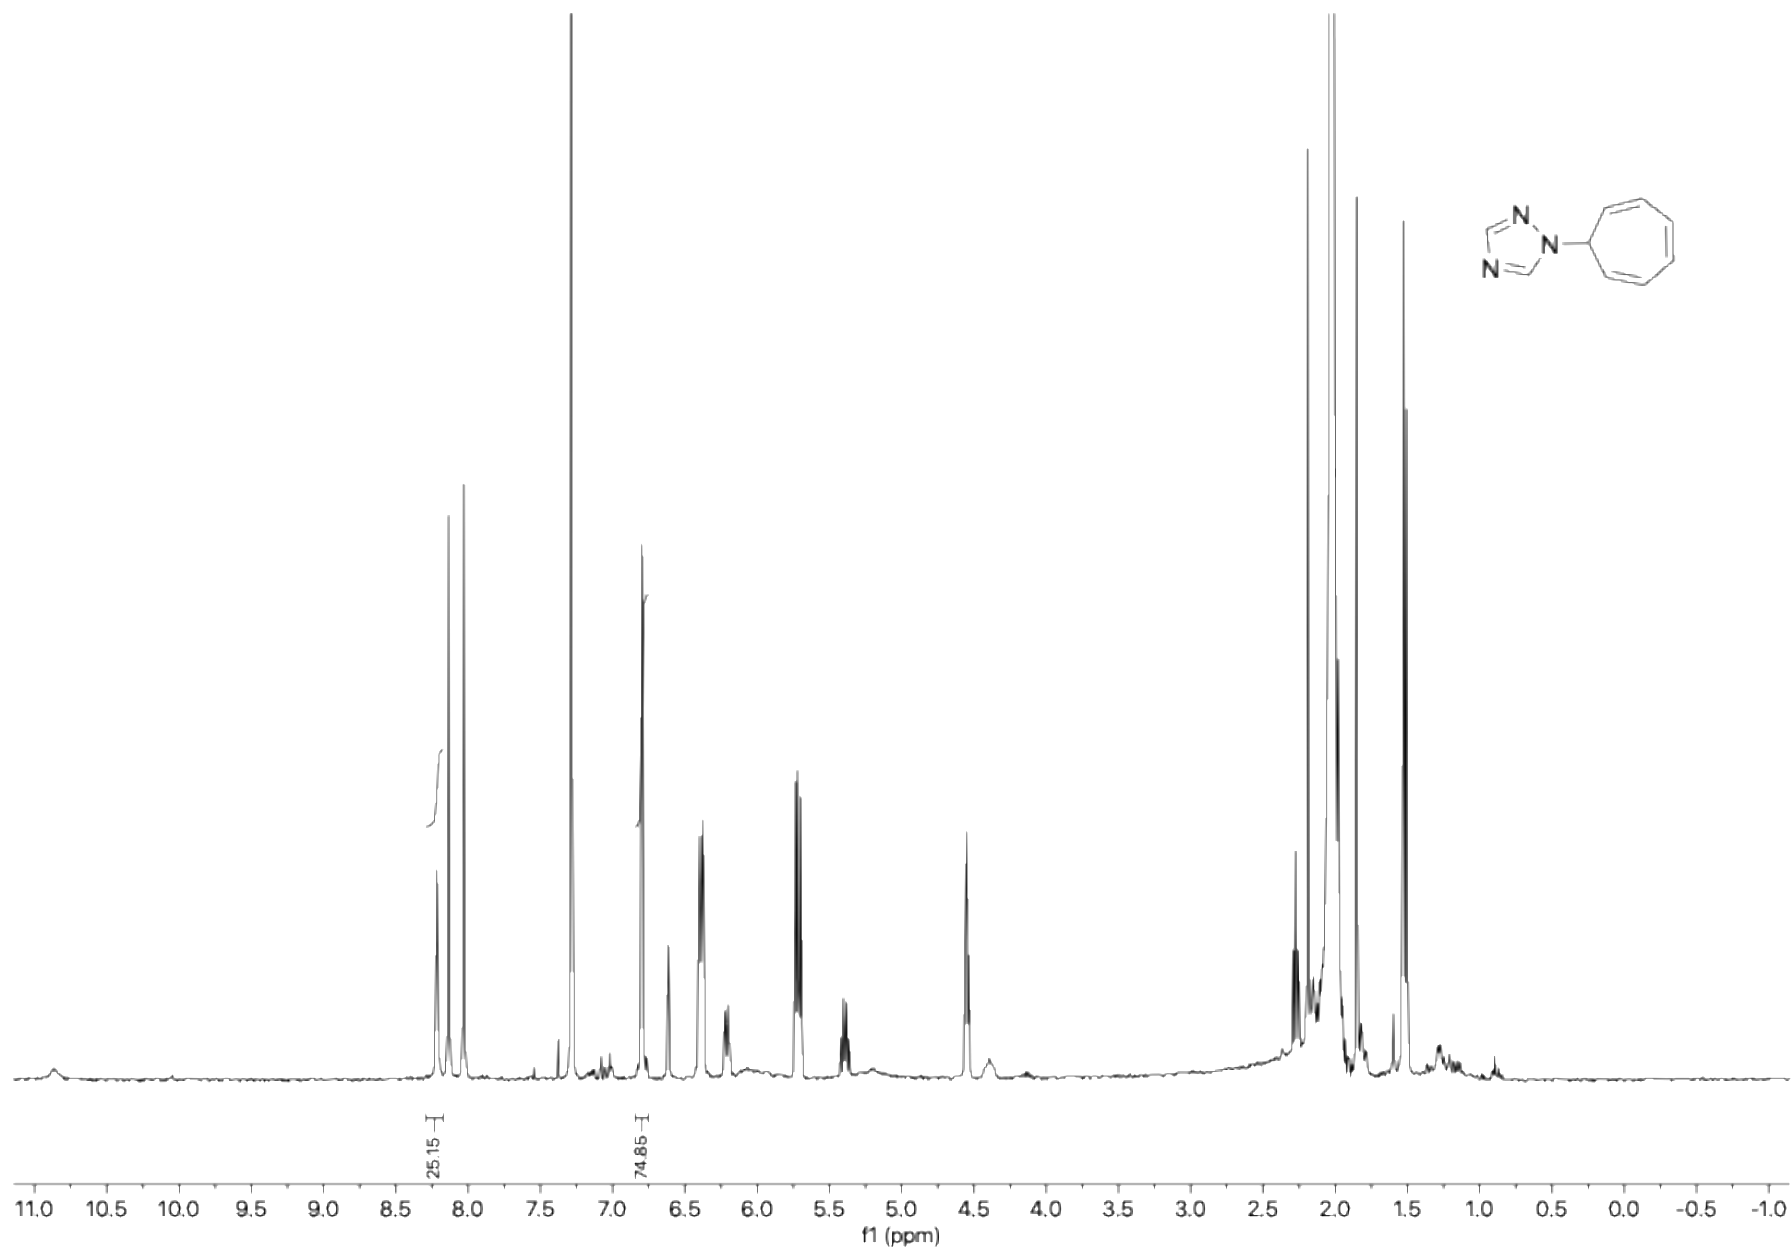

<sup>1</sup>H-NMR (400 MHz CDCl<sub>3</sub>) Crude NMR of 1-(Cyclohepta-2,4,6-trienyl-1-yl)-1H-imidazole (7j)

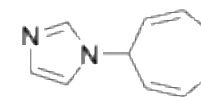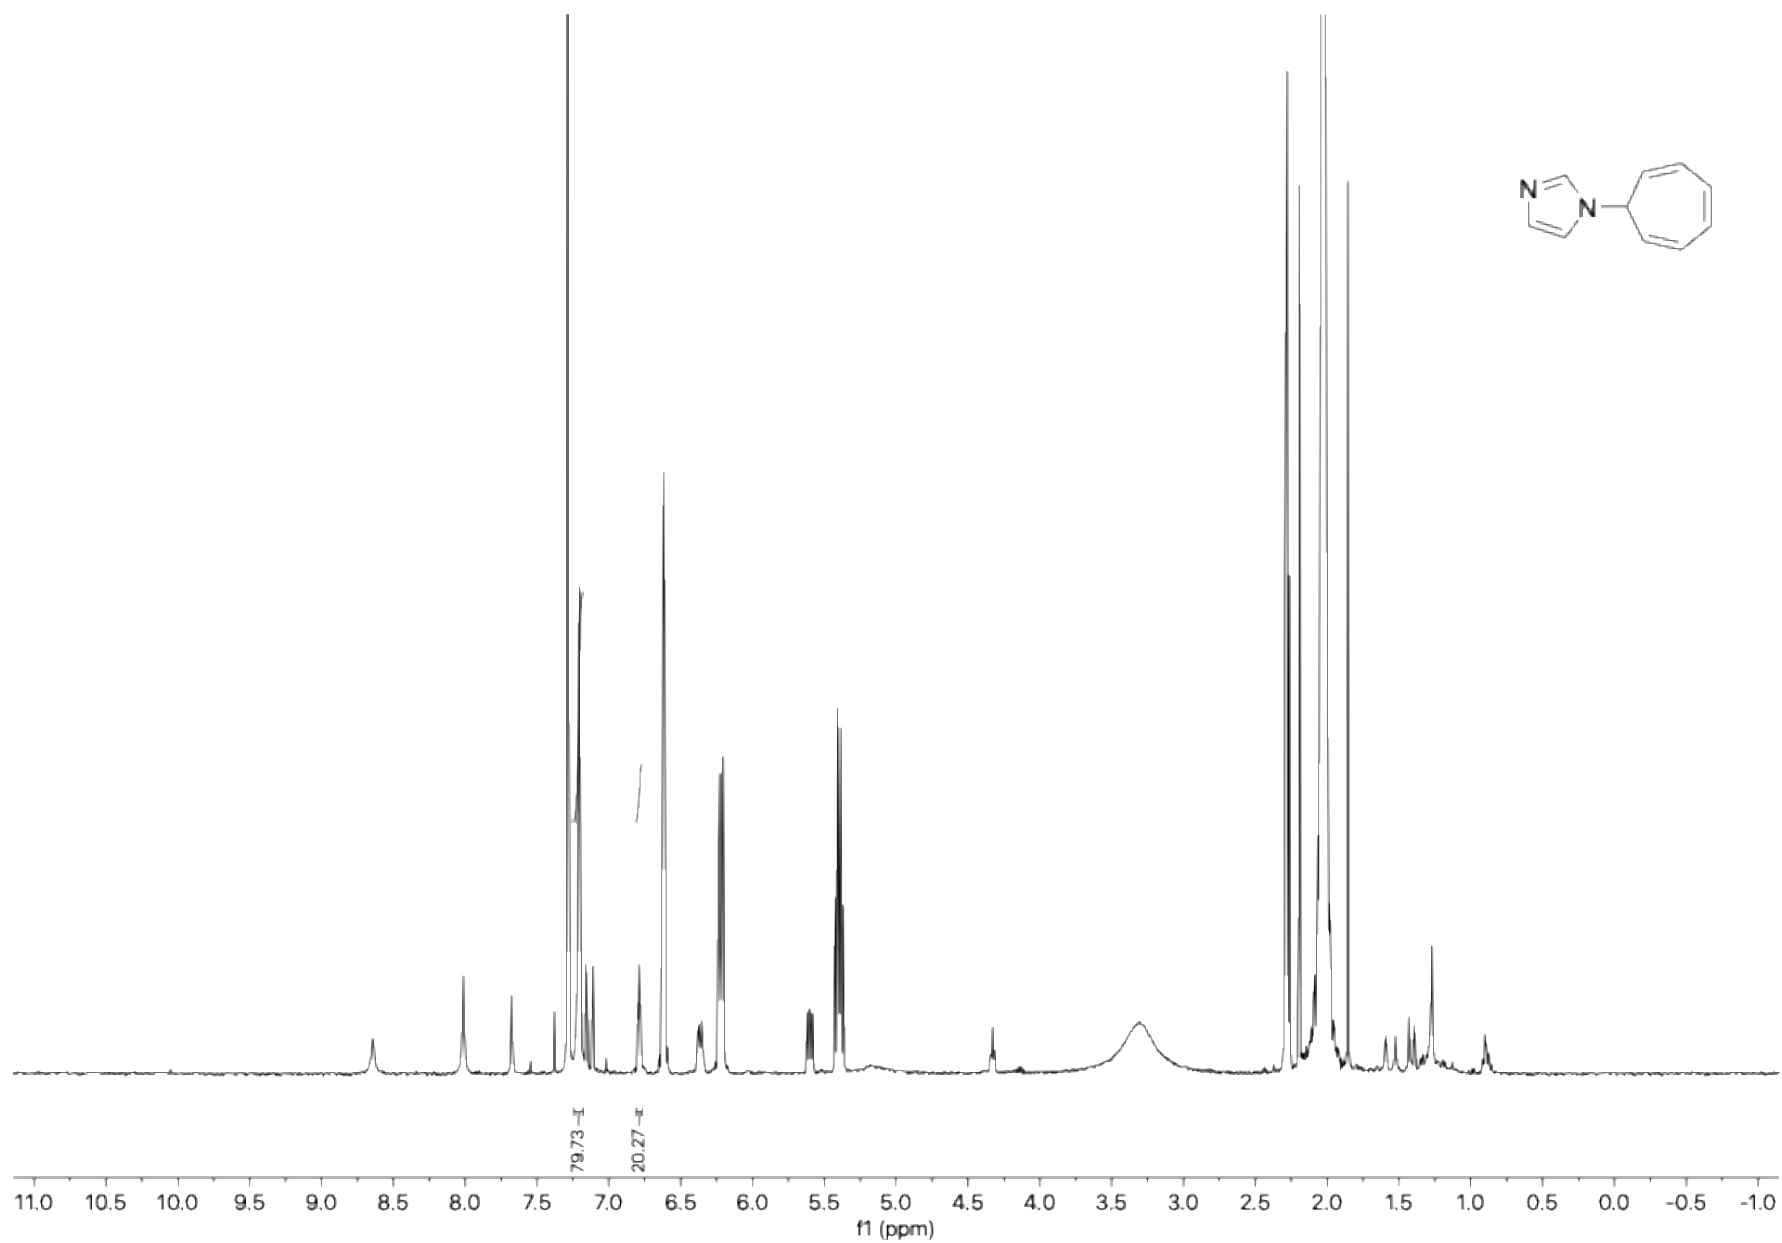

<sup>1</sup>H-NMR (400 MHz CDCl<sub>3</sub>) 1-Cyclohepta-2,4,6-trienyl-1H-indazole (7k)

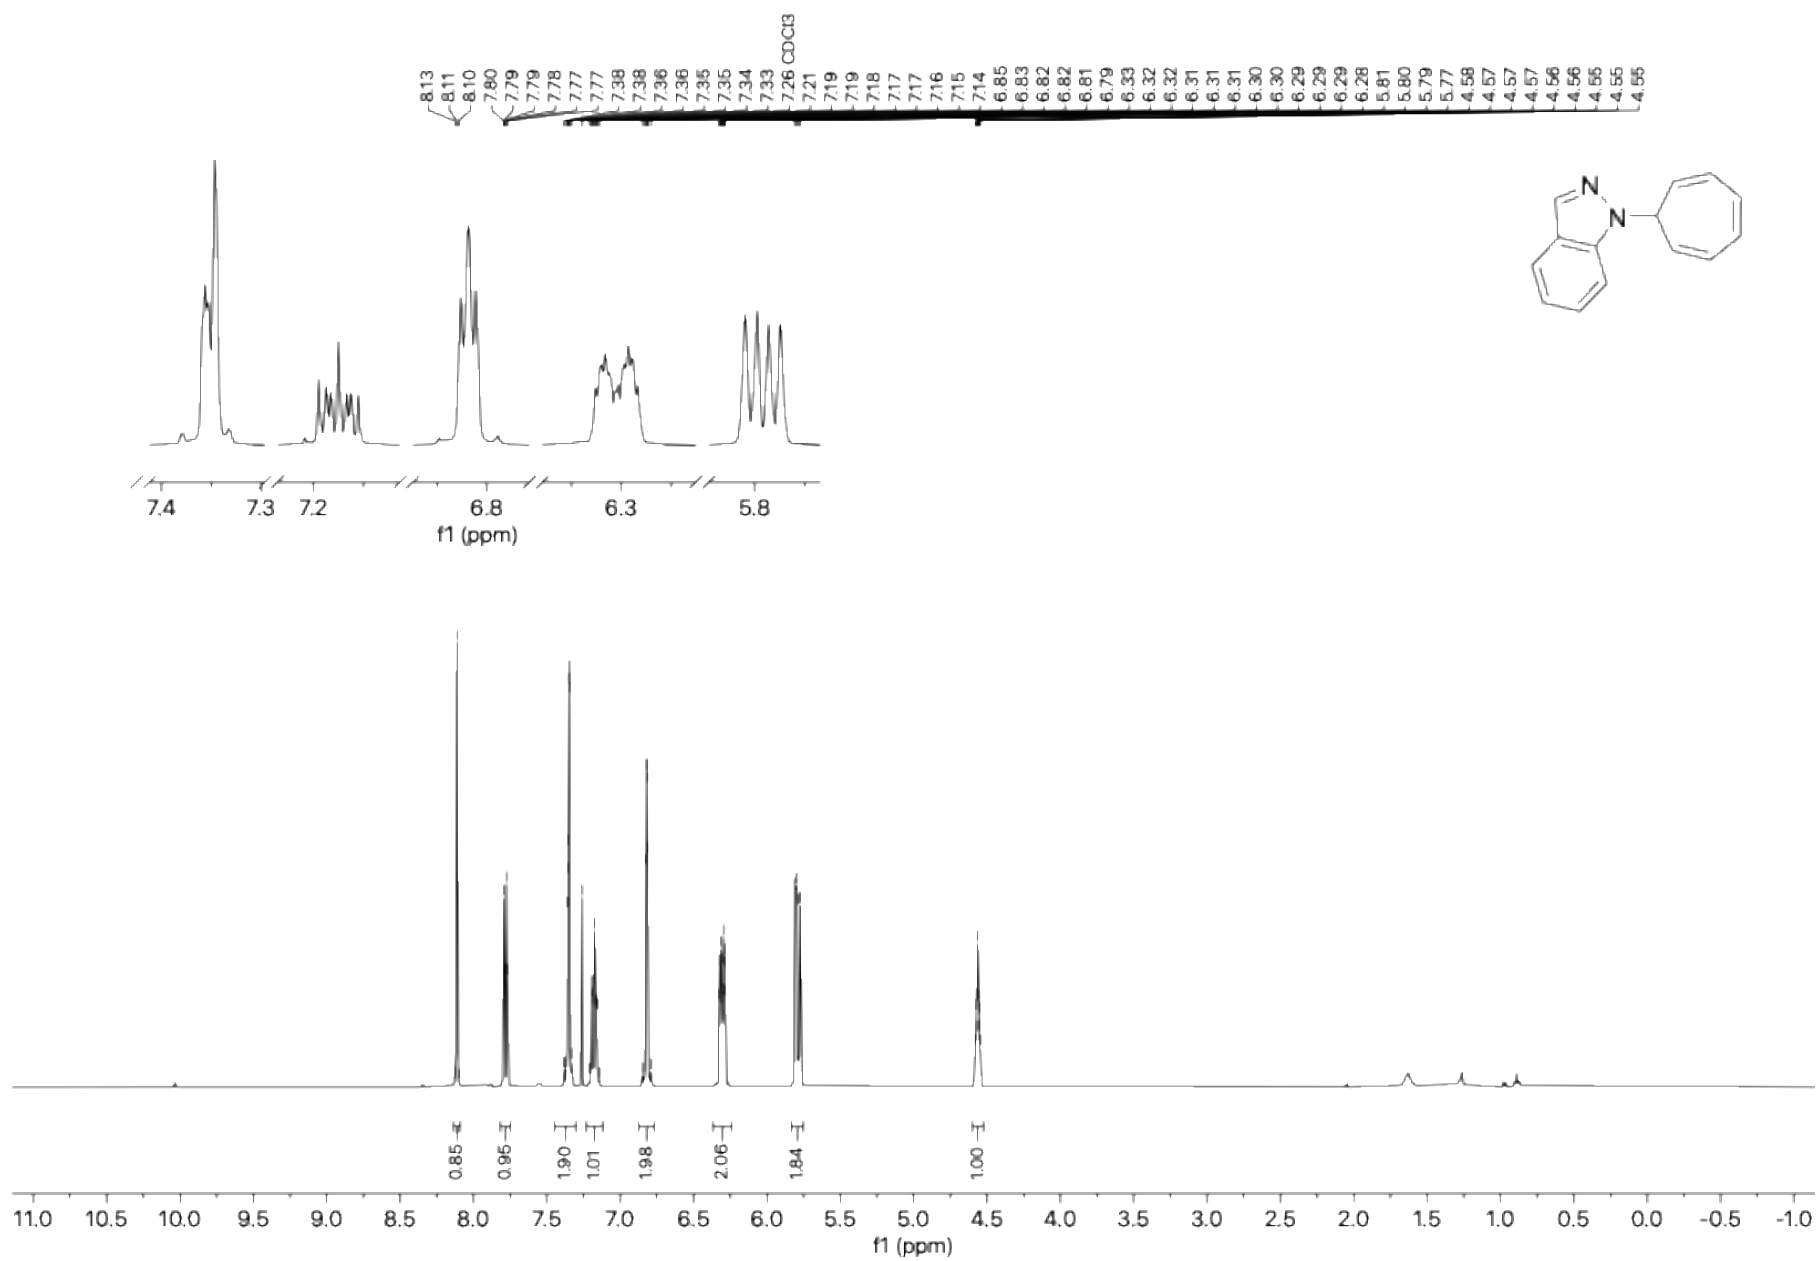

$^{13}\text{C}$ -NMR (101 MHz  $\text{CDCl}_3$ ) 1-Cyclohepta-2,4,6-trienyl-1H-indazole (7k)

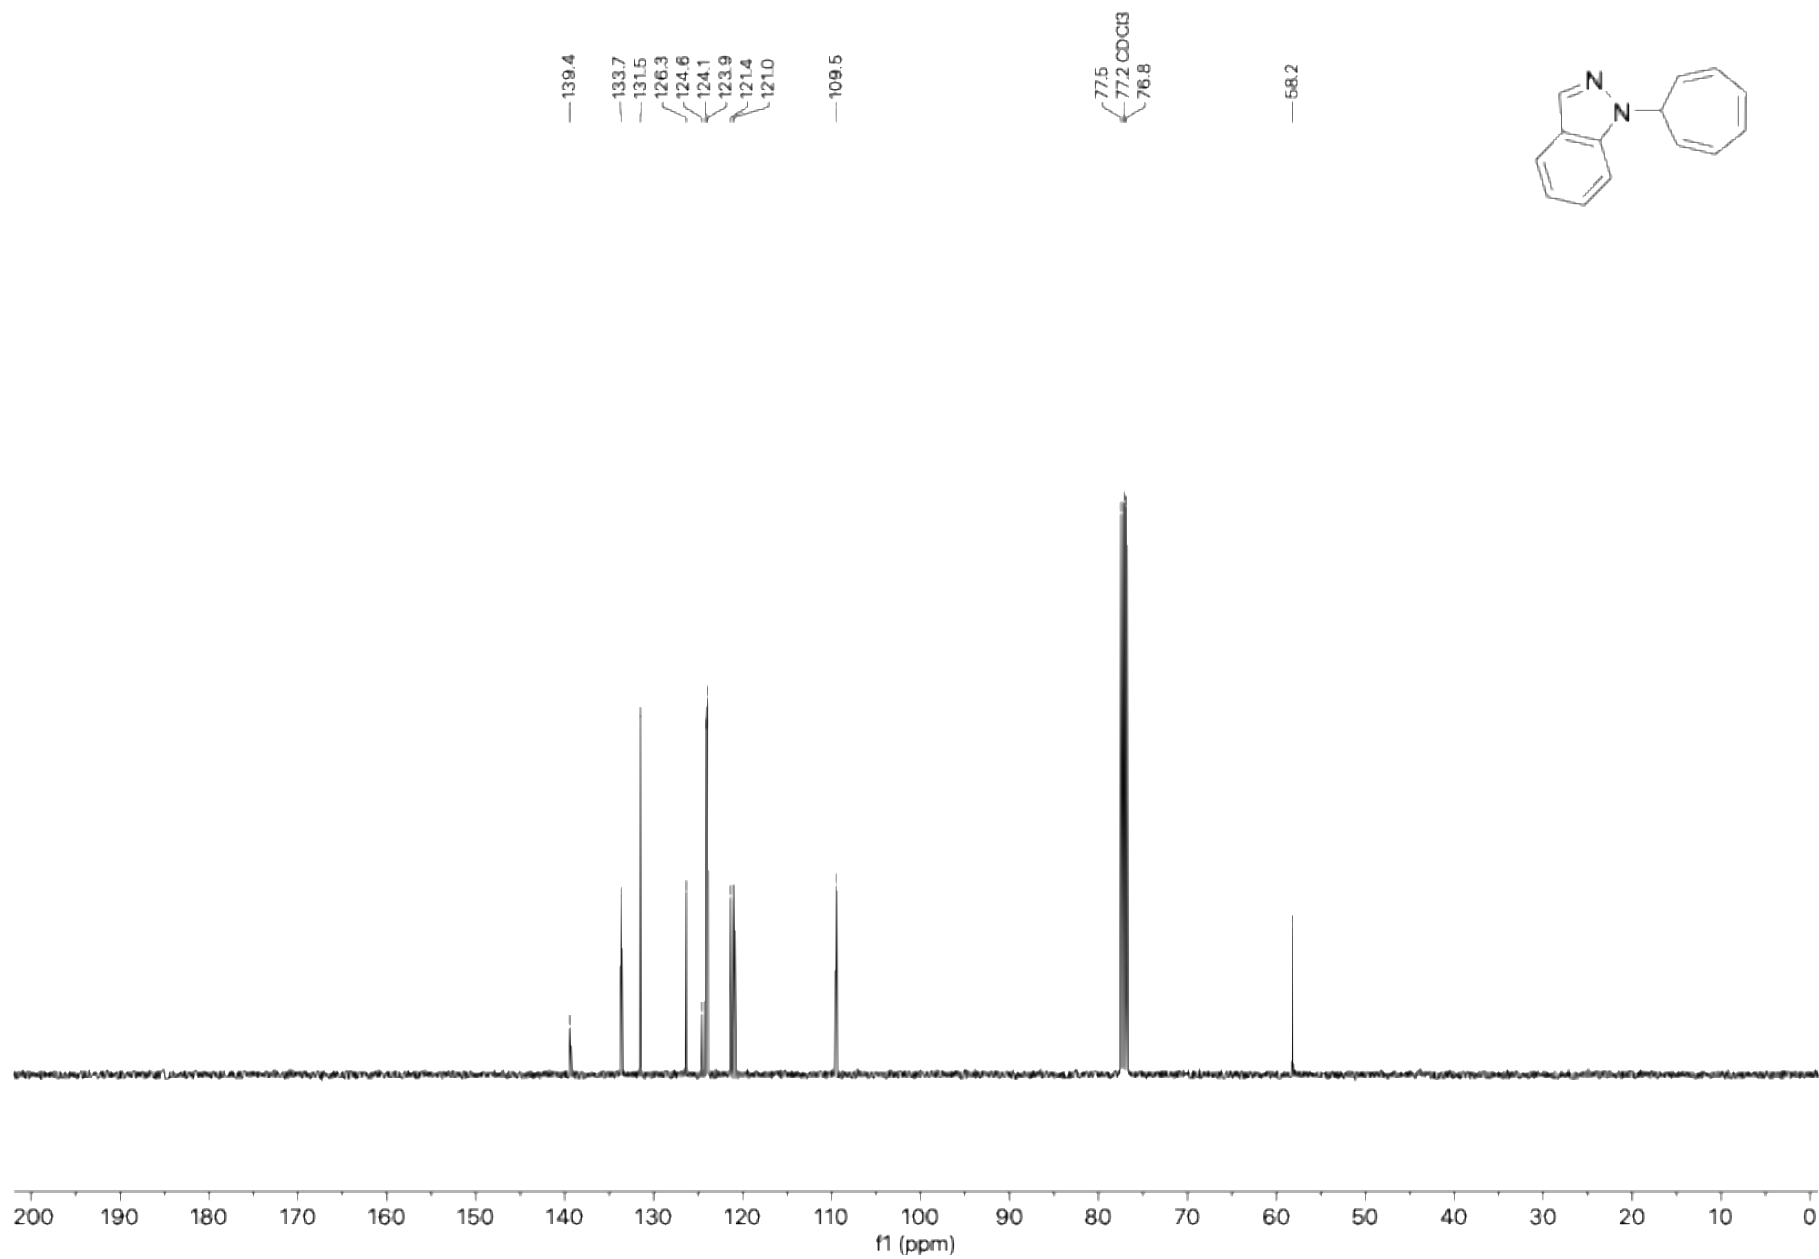

<sup>1</sup>H-NMR (400 MHz CDCl<sub>3</sub>) Crude NMR of 7-phenylthiocycloheptatriene(7I)

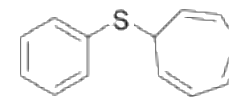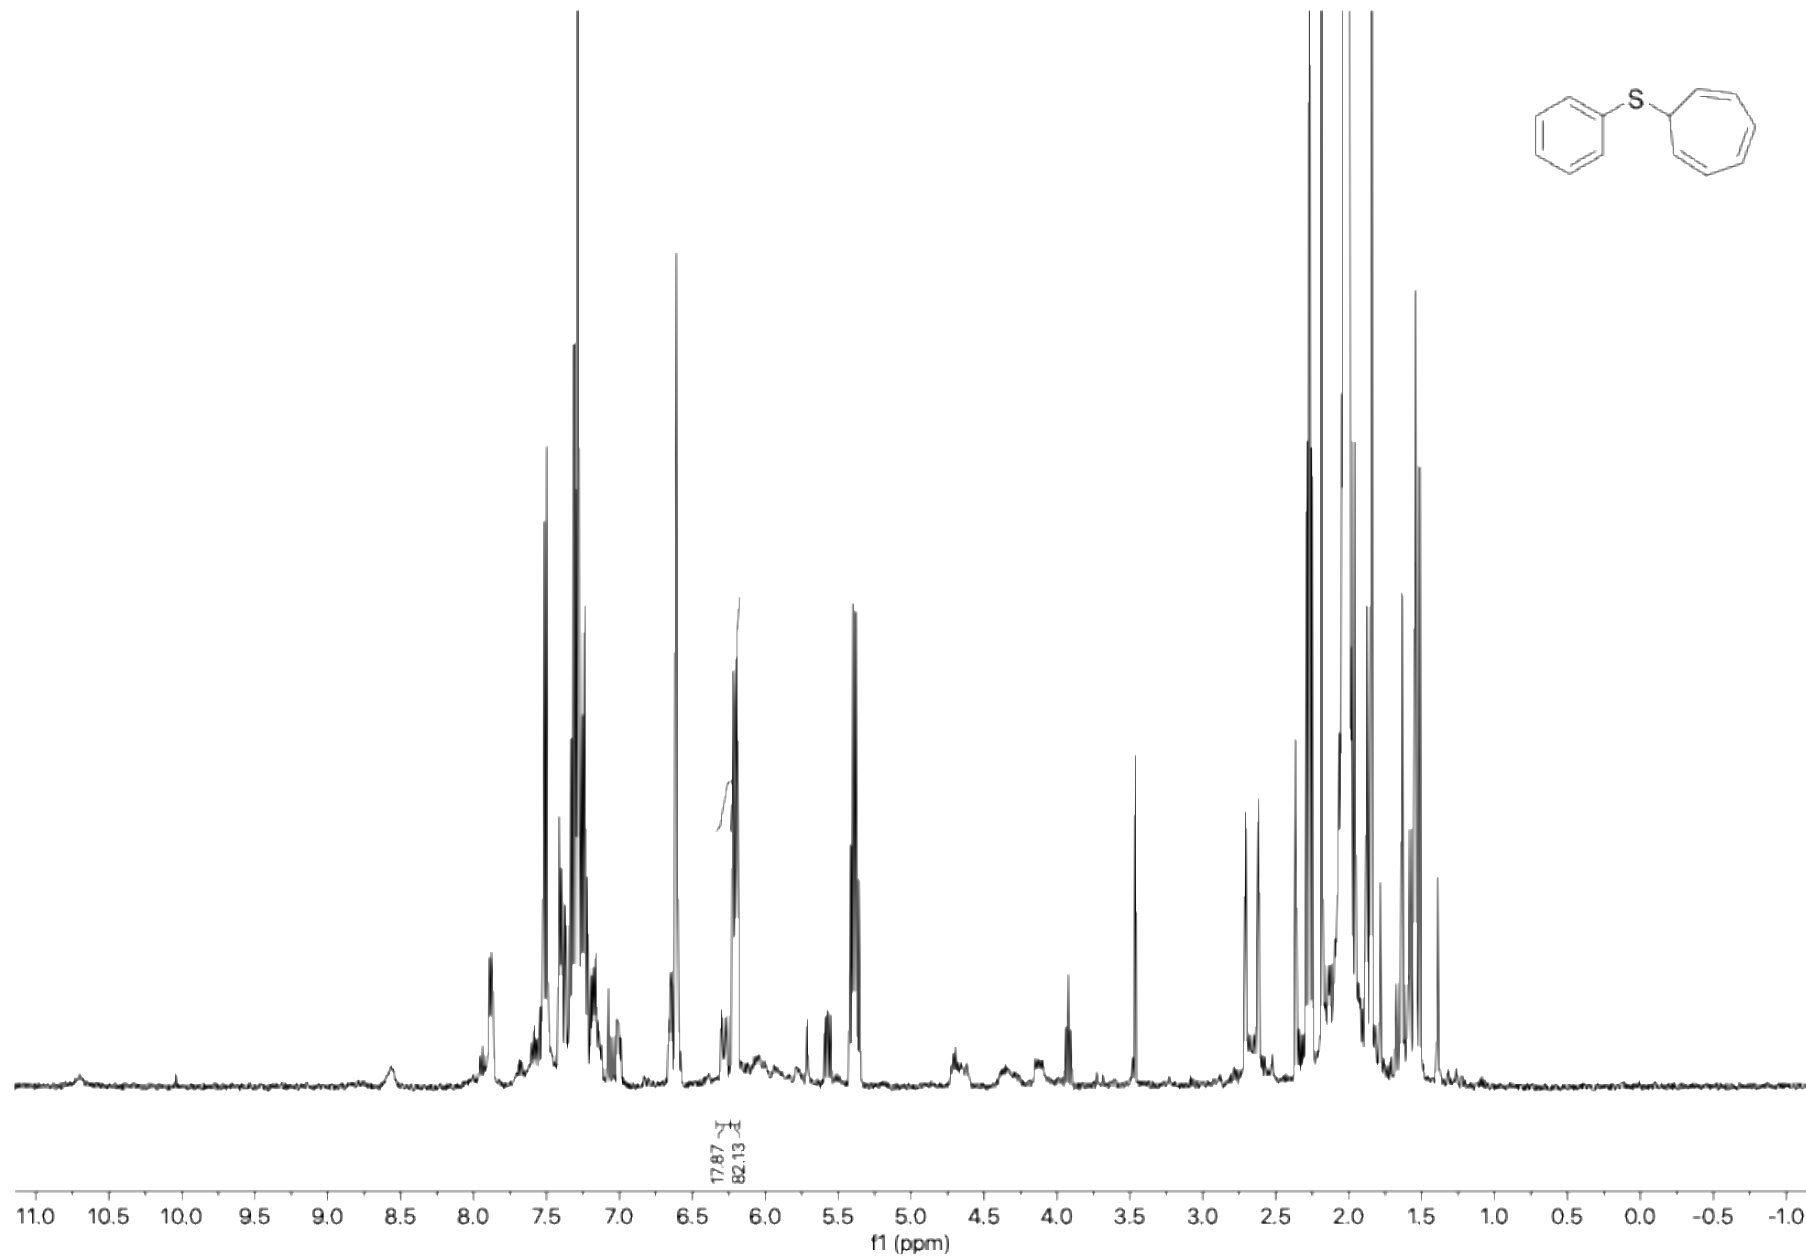

Supplement: d6ra02034h1.pdf [file d6ra02034h1.pdf]
